# Supplementary material
Source: bioRxiv or medRxiv preprint supplement (https://medrxiv.org/highwire/filestream/88432/field_highwire_adjunct_files/0/2020.07.02.20144774-1.pdf)
Supplement: Supplementary file [file 2020.07.02.20144774-1.pdf]

## **Genome-Wide Association Study Meta-analysis and Functional Annotation at Mitral Valve Prolapse Risk Loci**

Mengyao Yu<sup>1</sup>, PhD, Sergiy Kyryachenko<sup>1</sup>, PhD, Stephanie Debette<sup>2,3</sup>, MD, PhD, Philippe Amouyel<sup>4</sup>, MD, PhD, Jean-Jacques Schott<sup>5</sup>, PhD, Thierry Le Tourneau<sup>5</sup>, MD, PhD, Christian Dina<sup>5</sup>, PhD, Russell A Norris<sup>6,7</sup>, PhD, Albert A. Hagège<sup>8</sup>, MD, PhD, Xavier Jeunemaitre<sup>1</sup>, MD, PhD, Nabila Bouatia-Naji<sup>1\*</sup>, PhD

<sup>1</sup> PARCC, Inserm, Université de Paris, F-75015 Paris, France

<sup>2</sup> University of Bordeaux, Bordeaux Population Health Research Center, Inserm Center U1219, Bordeaux, France

<sup>3</sup> Department of Neurology, Bordeaux University Hospital, Inserm U1219, Bordeaux, France

<sup>4</sup> Univ. Lille, Inserm, CHU Lille, Institut Pasteur de Lille, U1167 - RID-AGE - Labex DISTALZ - Risk factors and molecular determinants of aging-related disease, F-59000 Lille, France

<sup>5</sup> Université de Nantes, INSERM, CNRS, CHU Nantes, l'institut du thorax, F-44000 Nantes, France

<sup>6</sup> Department of Regenerative Medicine and Cell Biology, Medical University of South Carolina, Charleston, SC, USA

<sup>7</sup> Department of Medicine, Medical University of South Carolina, Charleston, SC, USA

<sup>8</sup> Assistance Publique – Hôpitaux de Paris, Department of Cardiology, Hôpital Européen Georges Pompidou, 75015, Paris, France

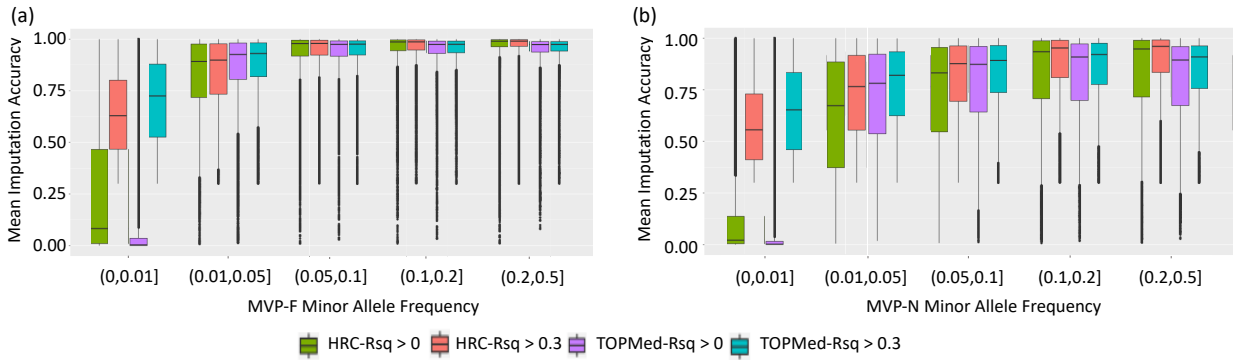

**Supplementary Figure I. Mean imputation accuracy in MAF categories in MVP-F and MVP-N using HRC and TopMED panels for SNPs of Chr2.** Box plots show the distribution of imputation accuracy for (a) variants in GWAS MVP-F and (b) variants in GWAS MVP-N using HRC and TOPMed.

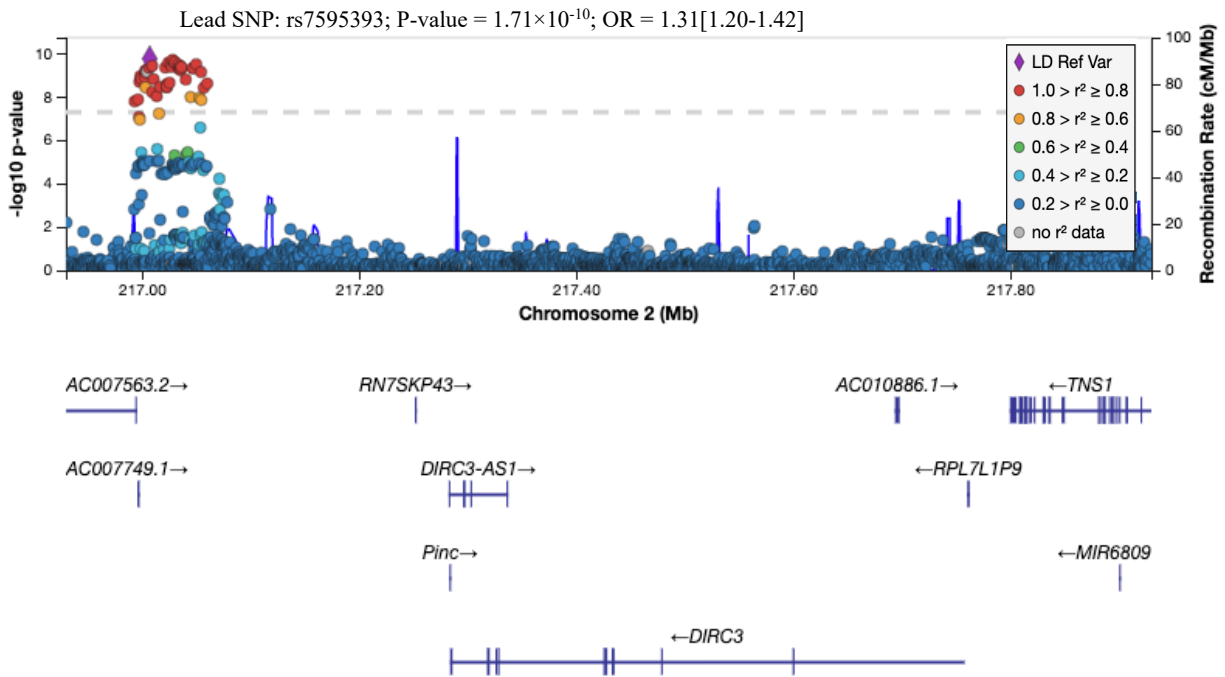

**Supplementary Figure II. Genomic context of novel association signals of MVP at *TNS1* locus.** The regional association plots (generated by LocusZoom) show the surrounding genes ( $\pm 500$  Kb). The lead SNPs per locus are labeled and the near SNPs are colored according to LD patterns with the lead SNP.

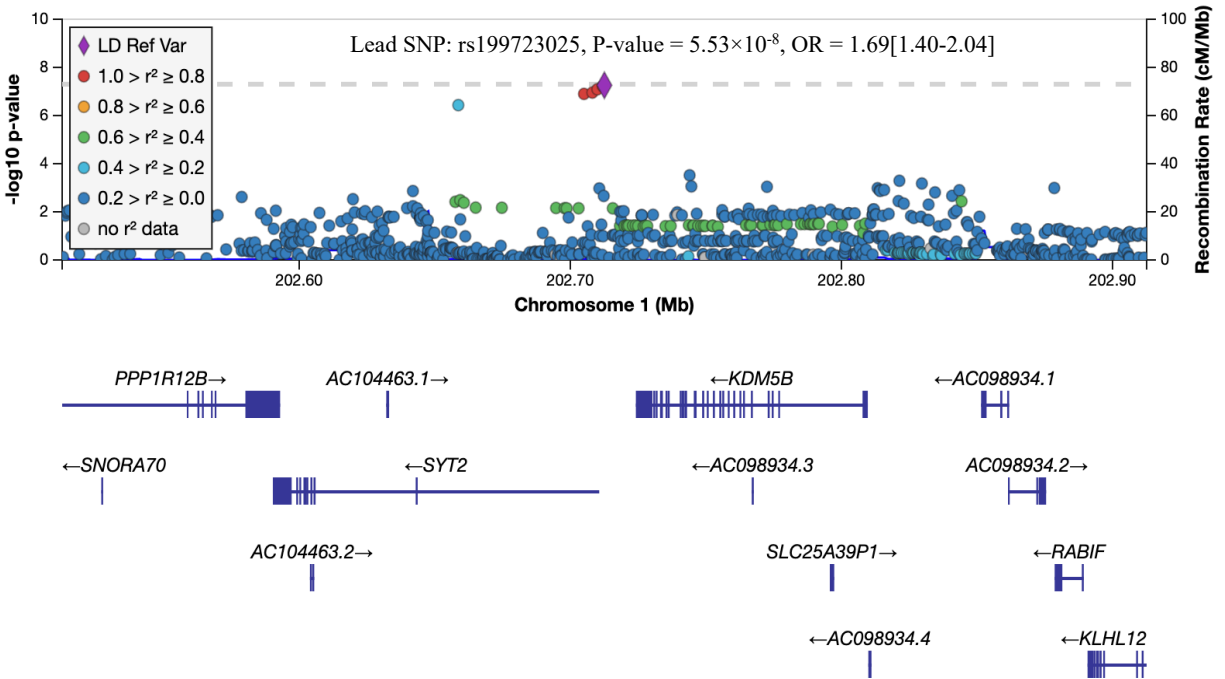

**Supplementary Figure III. Genomic context of novel association signals of MVP at SYT2 locus.** The regional association plots (generated by LocusZoom) show the surrounding genes ( $\pm 500$  Kb). The lead SNPs per locus are labeled and the near SNPs are colored according to LD patterns with the lead SNP.

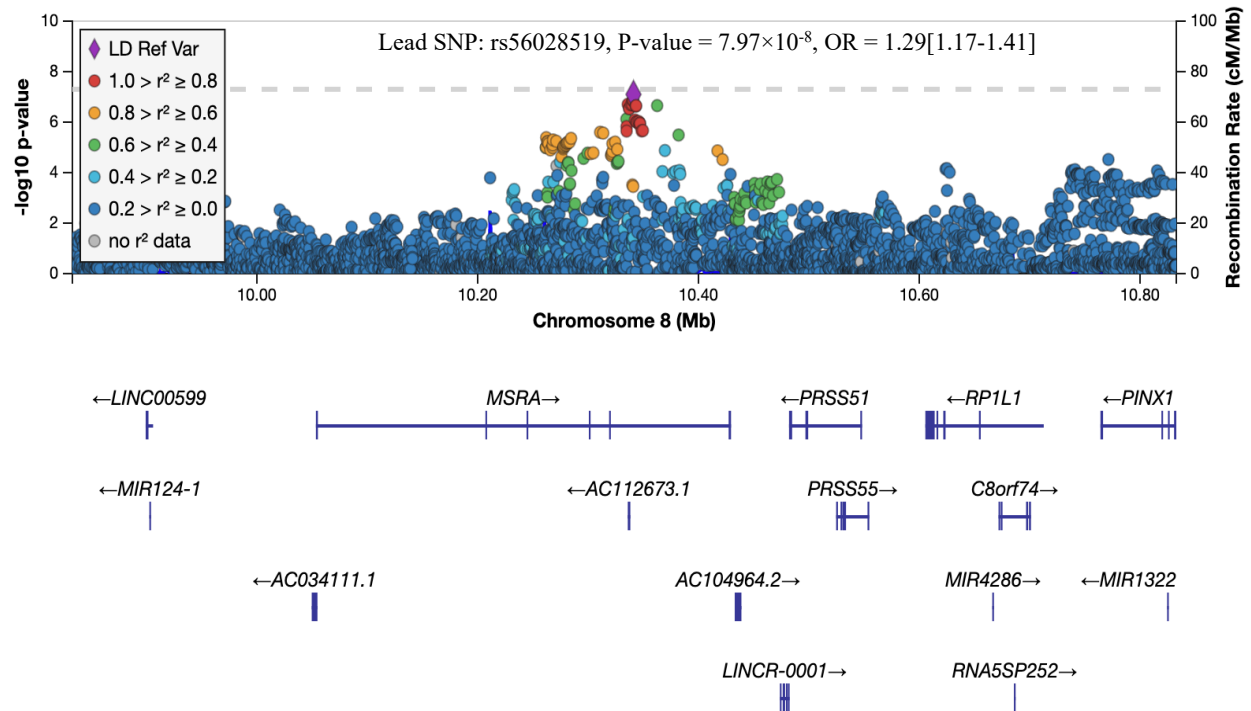

**Supplementary Figure IV Genomic context of novel association signals of MVP at *MSRA* locus.** The regional association plots (generated by LocusZoom) show the surrounding genes ( $\pm 500$  Kb). The lead SNPs per locus are labeled and the near SNPs are colored according to LD patterns with the lead SNP.

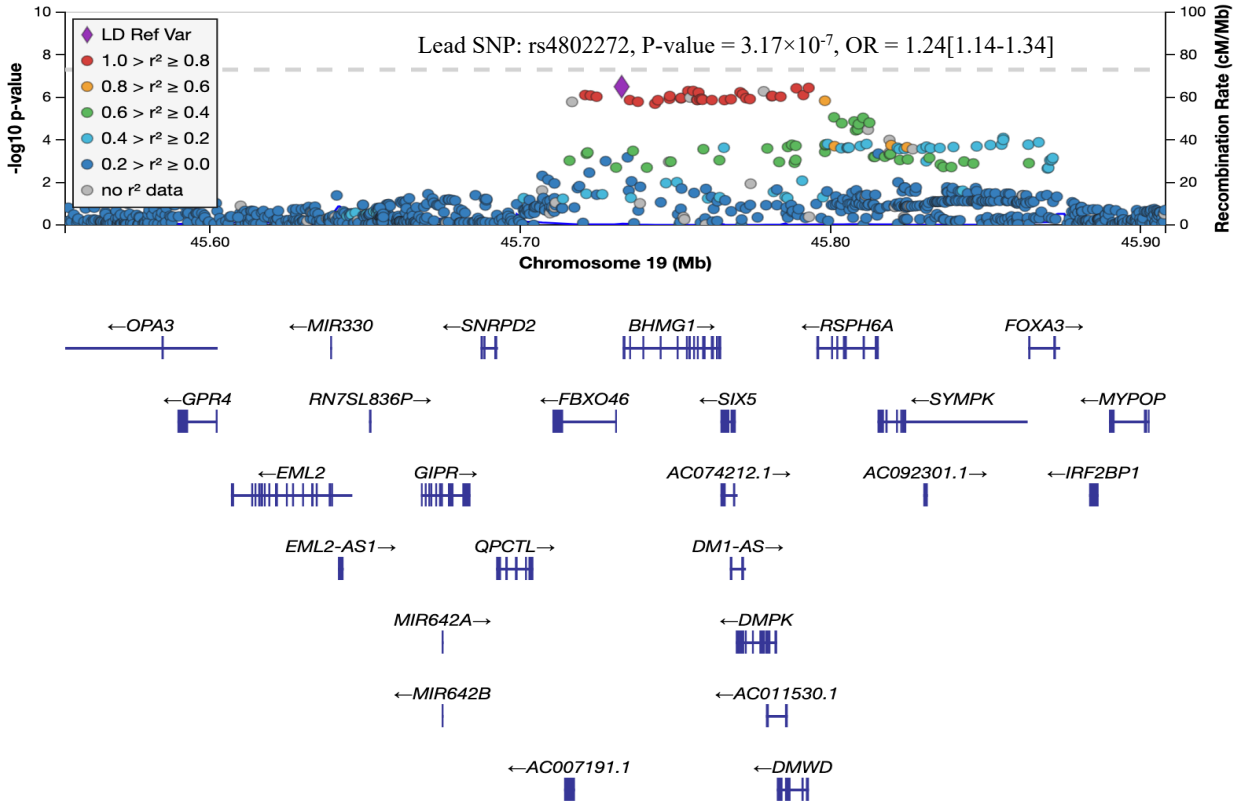

**Supplementary Figure V. Genomic context of novel association signals of MVP at *FBXO46* locus.** The regional association plots (generated by LocusZoom) show the surrounding genes ( $\pm 500$  Kb). The lead SNPs per locus are labeled and the near SNPs are colored according to LD patterns with the lead SNP.

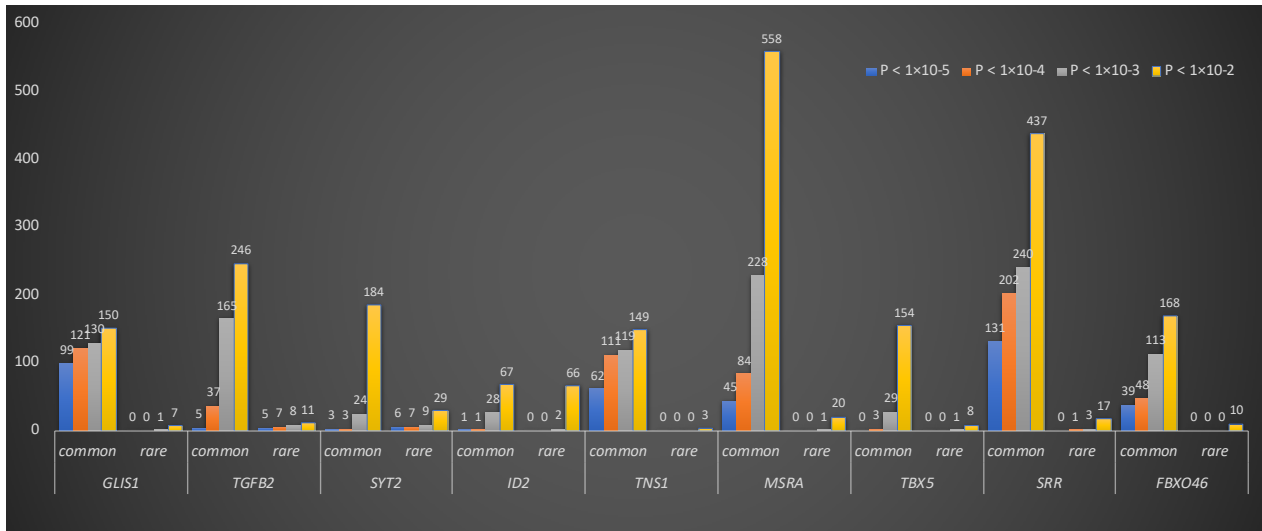

**Supplementary Figure VI. Common and rare variants contributing to the highlighted genes.** Genes are highlighted by Meta-GWAS or gene-based association analysis. Variants are defined by  $\pm 500\text{kb}$  of the top variant for each locus. Genes located in the same locus at chromosome 8 are represented by *SRR*, as well as genes at chromosome 19, which are represented by *FBXO46*. Common variant (MAF > 0.05); Rare variant ( $0.01 < \text{MAF} < 0.05$ )

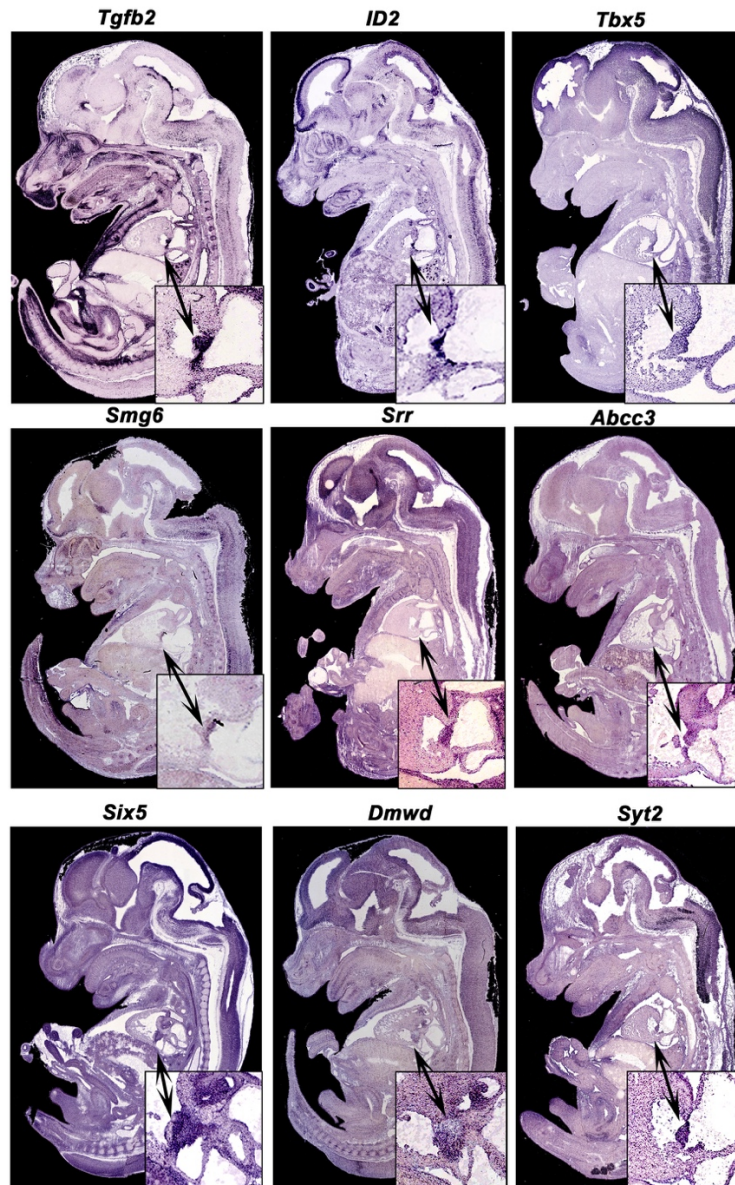

**Supplementary Figure VII.** Expression of GWAS candidate genes within the mitral valves. Section in situ of *Tgfb2*, *Id2*, *Tbx5*, *Smg6*, *Srr*, *Abcc3*, *Six5*, *Dmwd* and *Syt2* at E14.5 showing robust mRNA expression within the developing mitral leaflets. Boxes are higher magnifications of mitral valve regions.



Supplementary Table I. Functional annotation of variants in the genomic loci associated with MVP

| LOCUS                   | IND*                   | uniqID                 | rsID               | chr              | pos              | MAF†            | gwasP              | r2‡                | IndSigSNP          | nearestGene                  | func              | CADD§        | RDB       |
|-------------------------|------------------------|------------------------|--------------------|------------------|------------------|-----------------|--------------------|--------------------|--------------------|------------------------------|-------------------|--------------|-----------|
| <i>SYT2</i>             | 1                      | 1:202196119:C:T        | rs78649964         | 1                | 202196119        | 0.02            | 8.60E-05           | 0.66               | rs112998238        | <i>LGR6</i>                  | intronic          | 5.31         | 5         |
|                         |                        | <b>1:202311574:C:T</b> | <b>rs111749026</b> | <b>1</b>         | <b>202311574</b> | <b>0.02</b>     | <b>4.05E-07</b>    | <b>1.00</b>        | <b>rs112998238</b> | <b><i>UBE2T</i></b>          | <b>upstream</b>   | <b>11.77</b> | <b>3a</b> |
|                         |                        | <b>1:202377863:C:G</b> | <b>rs112998238</b> | <b>1</b>         | <b>202377863</b> | <b>0.02</b>     | <b>3.54E-07</b>    | <b>1.00</b>        | <b>rs112998238</b> | <b><i>PPP1R12B</i></b>       | <b>intronic</b>   | <b>0.17</b>  | <b>7</b>  |
|                         |                        | 1:202408478:A:G        | rs113782613        | 1                | 202408478        | 0.02            | 3.73E-07           | 1.00               | rs112998238        | <i>PPP1R12B:RP11-175B9.2</i> | ncRNA_exonic      | 3.70         | 5         |
|                         |                        | 1:202626750:C:T        | rs13374701         | 1                | 202626750        | 0.02            | 0.003839           | 0.75               | rs112998238        | <i>SYT2</i>                  | intronic          | 5.41         | 4         |
|                         |                        | 1:202628546:A:C        | rs113288481        | 1                | 202628546        | 0.02            | 0.003286           | 0.78               | rs112998238        | <i>SYT2</i>                  | intronic          | 7.03         | 5         |
|                         |                        | 1:202629900:C:T        | rs77186822         | 1                | 202629900        | 0.02            | 0.004182           | 0.75               | rs112998238        | <i>SYT2</i>                  | intronic          | 0.72         | 7         |
|                         |                        | 1:202634248:C:T        | rs59524062         | 1                | 202634248        | 0.02            | 0.006702           | 0.75               | rs112998238        | <i>SYT2</i>                  | intronic          | 0.58         | 7         |
|                         |                        | 1:202643904:A:G        | rs111719840        | 1                | 202643904        | 0.02            | 0.006775           | 0.78               | rs112998238        | <i>SYT2</i>                  | intronic          | 12.21        | 7         |
|                         |                        | 1:202663886:C:T        | rs112186462        | 1                | 202663886        | 0.02            | 0.00693            | 0.78               | rs112998238        | <i>SYT2</i>                  | intronic          | 0.59         | 6         |
|                         |                        | 1:202667067:C:T        | rs61100519         | 1                | 202667067        | 0.02            | 0.00706            | 0.75               | rs112998238        | <i>SYT2</i>                  | intronic          | 3.64         | 5         |
|                         |                        | 1:202667819:A:G        | rs60329509         | 1                | 202667819        | 0.02            | 0.007178           | 0.75               | rs112998238        | <i>SYT2</i>                  | intronic          | 4.91         | 7         |
|                         |                        | 1:202684824:A:G        | rs80175962         | 1                | 202684824        | 0.02            | 0.007161           | 0.81               | rs112998238        | <i>SYT2</i>                  | intergenic        | 1.91         | 5         |
|                         |                        | 1:202672219:A:C        | rs113004178        | 1                | 202672219        | 0.03            | 0.007116           | 0.73               | rs112998238        | <i>SYT2</i>                  | intronic          | 7.91         | 5         |
|                         |                        | <b>1:202674197:C:T</b> | <b>rs4072661</b>   | <b>1</b>         | <b>202674197</b> | <b>0.04</b>     | <b>1.26E-07</b>    | <b>0.86</b>        | <b>rs199723025</b> | <b><i>SYT2</i></b>           | <b>intronic</b>   | <b>4.90</b>  | <b>3a</b> |
| 1:202677295:C:G         | rs17442900             | 1                      | 202677295          | 0.04             | 1.11E-07         | 0.84            | rs199723025        | <i>SYT2</i>        | intronic           | 1.51                         | 5                 |              |           |
| <b>2</b>                | <b>1:202679139:C:G</b> | <b>rs78985989</b>      | <b>1</b>           | <b>202679139</b> | <b>0.05</b>      | <b>8.13E-08</b> | <b>1.00</b>        | <b>rs199723025</b> | <b><i>SYT2</i></b> | <b>intronic</b>              | <b>10.49</b>      | <b>2b</b>    |           |
| 1:202681134:C:G         | rs61820945             | 1                      | 202681134          | 0.05             | 6.03E-08         | 1.00            | rs199723025        | <i>SYT2</i>        | intergenic         | 0.56                         | 5                 |              |           |
| <b>1:202681728:A:AT</b> | <b>rs199723025</b>     | <b>1</b>               | <b>202681728</b>   | <b>0.05</b>      | <b>5.53E-08</b>  | <b>1.00</b>     | <b>rs199723025</b> | <b><i>SYT2</i></b> | <b>intergenic</b>  | <b>8.83</b>                  | <b>NA</b>         |              |           |
| <b>3</b>                | <b>1:202627846:C:G</b> | <b>rs61820924</b>      | <b>1</b>           | <b>202627846</b> | <b>0.02</b>      | <b>3.69E-07</b> | <b>1.00</b>        | <b>rs61820924</b>  | <b><i>SYT2</i></b> | <b>intronic</b>              | <b>NA</b>         | <b>5</b>     |           |
| <i>TNSI</i>             | 1                      | 2:217894234:A:G        | rs12465506         | 2                | 217894234        | 0.49            | 4.90E-06           | 0.91               | rs13426489         | <i>RP11-574O16.1</i>         | intergenic        | 0.21         | 6         |
|                         |                        | 2:217905779:A:G        | rs13412666         | 2                | 217905779        | 0.48            | 4.30E-06           | 0.99               | rs13426489         | <i>RP11-574O16.1</i>         | intergenic        | 1.47         | 5         |
|                         |                        | 2:217905832:A:G        | rs13387042         | 2                | 217905832        | 0.48            | 4.41E-06           | 1.00               | rs13426489         | <i>RP11-574O16.1</i>         | intergenic        | 2.41         | 7         |
|                         |                        | <b>2:217906246:G:T</b> | <b>rs13426489</b>  | <b>2</b>         | <b>217906246</b> | <b>0.48</b>     | <b>3.54E-06</b>    | <b>1.00</b>        | <b>rs13426489</b>  | <b><i>RP11-574O16.1</i></b>  | <b>intergenic</b> | <b>5.34</b>  | <b>7</b>  |
|                         |                        | 2:217907514:C:G        | rs12620095         | 2                | 217907514        | 0.45            | 1.02E-05           | 0.90               | rs13426489         | <i>RP11-574O16.1</i>         | intergenic        | 2.62         | 6         |

|          |                        |                   |          |                  |             |                 |             |                  |                             |                   |              |           |
|----------|------------------------|-------------------|----------|------------------|-------------|-----------------|-------------|------------------|-----------------------------|-------------------|--------------|-----------|
|          | 2:217909463:A:G        | rs6721996         | 2        | 217909463        | 0.49        | 1.92E-05        | 0.95        | rs13426489       | <i>RP11-574O16.1</i>        | intergenic        | 1.49         | 7         |
|          | 2:217916052:G:T        | rs12613955        | 2        | 217916052        | 0.45        | 5.73E-06        | 0.89        | rs13426489       | <i>RP11-574O16.1</i>        | intergenic        | 6.28         | 6         |
|          | 2:217920769:G:T        | rs4442975         | 2        | 217920769        | 0.49        | 2.38E-05        | 0.93        | rs13426489       | <i>RP11-574O16.1</i>        | intergenic        | 2.32         | 5         |
| <b>2</b> | <b>2:217917882:A:G</b> | <b>rs2372946</b>  | <b>2</b> | <b>217917882</b> | <b>0.43</b> | <b>2.57E-07</b> | <b>1.00</b> | <b>rs2372946</b> | <b><i>RP11-574O16.1</i></b> | <b>intergenic</b> | <b>13.08</b> | <b>5</b>  |
|          | 2:217858659:C:T        | rs2272525         | 2        | 217858659        | 0.23        | 3.35E-05        | 0.67        | rs6435957        | <i>AC007563.5</i>           | ncRNA_intronic    | 1.67         | NA        |
|          | 2:217860799:A:T        | rs10932687        | 2        | 217860799        | 0.23        | 1.63E-05        | 0.67        | rs6435957        | <i>RP11-574O16.1</i>        | ncRNA_exonic      | 2.42         | 7         |
|          | 2:217860966:C:T        | rs12614767        | 2        | 217860966        | 0.23        | 1.45E-05        | 0.67        | rs6435957        | <i>RP11-574O16.1</i>        | ncRNA_exonic      | NA           | 7         |
|          | 2:217863481:C:G        | rs10932688        | 2        | 217863481        | 0.27        | 1.31E-05        | 0.81        | rs6435957        | <i>RP11-574O16.1</i>        | intergenic        | 0.46         | 7         |
|          | 2:217863554:A:T        | rs10207736        | 2        | 217863554        | 0.30        | 3.62E-06        | 0.96        | rs6435957        | <i>RP11-574O16.1</i>        | intergenic        | 2.14         | 7         |
|          | 2:217864601:A:G        | rs12464018        | 2        | 217864601        | 0.23        | 9.80E-06        | 0.67        | rs6435957        | <i>RP11-574O16.1</i>        | intergenic        | 8.41         | 4         |
|          | :217865221:C:CTG       | rs75693059        | 2        | 217865221        | 0.26        | 1.41E-05        | 0.77        | rs6435957        | <i>RP11-574O16.1</i>        | intergenic        | 7.81         | NA        |
|          | <b>2:217865319:C:T</b> | <b>rs16856812</b> | <b>2</b> | <b>217865319</b> | <b>0.23</b> | <b>8.96E-06</b> | <b>0.68</b> | <b>rs6435957</b> | <b><i>RP11-574O16.1</i></b> | <b>intergenic</b> | <b>5.96</b>  | <b>2b</b> |
|          | 2:217865690:G:T        | rs12477491        | 2        | 217865690        | 0.23        | 1.32E-05        | 0.67        | rs6435957        | <i>RP11-574O16.1</i>        | intergenic        | 7.54         | 6         |
|          | 2:217865714:A:T        | rs12477493        | 2        | 217865714        | 0.26        | 1.14E-05        | 0.77        | rs6435957        | <i>RP11-574O16.1</i>        | intergenic        | 8.27         | 6         |
|          | 2:217865990:G:T        | rs10932689        | 2        | 217865990        | 0.26        | 1.20E-05        | 0.77        | rs6435957        | <i>RP11-574O16.1</i>        | intergenic        | 1.91         | 6         |
|          | 2:217866038:A:G        | rs10932690        | 2        | 217866038        | 0.26        | 1.22E-05        | 0.77        | rs6435957        | <i>RP11-574O16.1</i>        | intergenic        | 1.89         | 6         |
|          | 2:217866364:A:G        | rs12613030        | 2        | 217866364        | 0.22        | 1.34E-05        | 0.67        | rs6435957        | <i>RP11-574O16.1</i>        | intergenic        | 3.72         | 7         |
|          | 2:217871382:A:G        | rs60977503        | 2        | 217871382        | 0.23        | 8.91E-06        | 0.64        | rs6435957        | <i>RP11-574O16.1</i>        | intergenic        | 1.19         | 6         |
|          | 2:217878159:C:T        | rs58844941        | 2        | 217878159        | 0.23        | 9.42E-06        | 0.70        | rs6435957        | <i>RP11-574O16.1</i>        | intergenic        | 3.62         | 5         |

|          |                        |                   |          |                  |             |                 |             |                  |                      |                   |              |           |
|----------|------------------------|-------------------|----------|------------------|-------------|-----------------|-------------|------------------|----------------------|-------------------|--------------|-----------|
|          | <b>2:217878209:C:T</b> | <b>rs6435957</b>  | <b>2</b> | <b>217878209</b> | <b>0.31</b> | <b>2.53E-06</b> | <b>1.00</b> | <b>rs6435957</b> | <b>RP11-574O16.1</b> | <b>intergenic</b> | <b>2.62</b>  | <b>6</b>  |
|          | 2:217879696:A:C        | rs10932691        | 2        | 217879696        | 0.25        | 8.50E-06        | 0.68        | rs6435957        | RP11-574O16.1        | intergenic        | 3.08         | 5         |
|          | 2:217881943:C:T        | rs12614773        | 2        | 217881943        | 0.23        | 3.44E-05        | 0.66        | rs6435957        | RP11-574O16.1        | intergenic        | 4.49         | 5         |
|          | 2:217884960:A:G        | rs67827031        | 2        | 217884960        | 0.23        | 2.81E-05        | 0.67        | rs6435957        | RP11-574O16.1        | intergenic        | 3.34         | 6         |
|          | 2:217885012:C:T        | rs66500840        | 2        | 217885012        | 0.24        | 3.49E-05        | 0.68        | rs6435957        | RP11-574O16.1        | intergenic        | 3.15         | 7         |
|          | 2:217885121:A:G        | rs17833842        | 2        | 217885121        | 0.23        | 3.62E-05        | 0.67        | rs6435957        | RP11-574O16.1        | intergenic        | 0.03         | 7         |
|          | <b>2:217887800:A:G</b> | <b>rs12623304</b> | <b>2</b> | <b>217887800</b> | <b>0.24</b> | <b>3.15E-05</b> | <b>0.68</b> | <b>rs6435957</b> | <b>RP11-574O16.1</b> | <b>intergenic</b> | <b>14.25</b> | <b>7</b>  |
|          | <b>2:217892371:A:C</b> | <b>rs10211289</b> | <b>2</b> | <b>217892371</b> | <b>0.29</b> | <b>1.22E-05</b> | <b>0.70</b> | <b>rs6435957</b> | <b>RP11-574O16.1</b> | <b>intergenic</b> | <b>3.05</b>  | <b>3a</b> |
|          | 2:217892714:C:T        | rs2372937         | 2        | 217892714        | 0.29        | 1.31E-05        | 0.70        | rs6435957        | RP11-574O16.1        | intergenic        | NA           | 6         |
|          | 2:217892870:A:G        | rs4315498         | 2        | 217892870        | 0.24        | 1.63E-05        | 0.64        | rs6435957        | RP11-574O16.1        | intergenic        | 1.48         | 6         |
| <b>3</b> | 2:217893189:A:G        | rs55999136        | 2        | 217893189        | 0.29        | 1.67E-05        | 0.70        | rs6435957        | RP11-574O16.1        | intergenic        | 1.29         | 7         |
|          | 2:217893936:A:G        | rs67188612        | 2        | 217893936        | 0.24        | 2.05E-05        | 0.63        | rs6435957        | RP11-574O16.1        | intergenic        | 0.77         | 6         |
|          | 2:217894058:A:G        | rs62174831        | 2        | 217894058        | 0.29        | 1.76E-05        | 0.69        | rs6435957        | RP11-574O16.1        | intergenic        | 0.18         | 6         |
|          | 2:217894149:A:G        | rs62174832        | 2        | 217894149        | 0.29        | 1.74E-05        | 0.70        | rs6435957        | RP11-574O16.1        | intergenic        | NA           | 6         |
|          | 2:217894756:C:T        | rs4491709         | 2        | 217894756        | 0.29        | 1.79E-05        | 0.69        | rs6435957        | RP11-574O16.1        | intergenic        | NA           | 6         |
|          | 217894898:T:TTGT       | rs3084573         | 2        | 217894898        | 0.29        | 1.84E-05        | 0.69        | rs6435957        | RP11-574O16.1        | intergenic        | 3.09         | NA        |
|          | 2:217895109:C:G        | rs2372938         | 2        | 217895109        | 0.29        | 1.85E-05        | 0.69        | rs6435957        | RP11-574O16.1        | intergenic        | 2.87         | 7         |
|          | 2:217895626:A:G        | rs12621130        | 2        | 217895626        | 0.24        | 2.09E-05        | 0.63        | rs6435957        | RP11-574O16.1        | intergenic        | 4.40         | 6         |
|          | 2:217896410:A:G        | rs115408807       | 2        | 217896410        | 0.24        | 1.88E-05        | 0.63        | rs6435957        | RP11-574O16.1        | intergenic        | 0.19         | NA        |

|                        |                   |          |                  |             |                 |             |                  |                             |                   |              |           |
|------------------------|-------------------|----------|------------------|-------------|-----------------|-------------|------------------|-----------------------------|-------------------|--------------|-----------|
| 2:217896449:A:G        | rs62174837        | 2        | 217896449        | 0.29        | 1.63E-05        | 0.69        | rs6435957        | <i>RP11-574O16.1</i>        | intergenic        | 1.38         | 5         |
| 2:217897341:A:G        | rs62174839        | 2        | 217897341        | 0.29        | 1.14E-05        | 0.67        | rs6435957        | <i>RP11-574O16.1</i>        | intergenic        | 2.15         | 7         |
| 2:217898935:C:T        | rs2372939         | 2        | 217898935        | 0.25        | 1.11E-05        | 0.61        | rs6435957        | <i>RP11-574O16.1</i>        | intergenic        | 1.18         | 6         |
| 2:217899252:C:G        | rs4583440         | 2        | 217899252        | 0.29        | 1.46E-05        | 0.67        | rs6435957        | <i>RP11-574O16.1</i>        | intergenic        | 0.70         | 7         |
| 2:217901803:C:T        | rs12615418        | 2        | 217901803        | 0.25        | 1.33E-05        | 0.61        | rs6435957        | <i>RP11-574O16.1</i>        | intergenic        | 2.92         | 5         |
| 2:217901910:A:G        | rs12621884        | 2        | 217901910        | 0.25        | 1.36E-05        | 0.61        | rs6435957        | <i>RP11-574O16.1</i>        | intergenic        | 0.19         | 5         |
| 935:G:GGCCTGTG         | rs141554046       | 2        | 217901935        | 0.25        | 1.52E-05        | 0.61        | rs6435957        | <i>RP11-574O16.1</i>        | intergenic        | 6.65         | NA        |
| <b>2:217902364:A:G</b> | <b>rs7421376</b>  | <b>2</b> | <b>217902364</b> | <b>0.25</b> | <b>1.32E-05</b> | <b>0.61</b> | <b>rs6435957</b> | <b><i>RP11-574O16.1</i></b> | <b>intergenic</b> | <b>22.10</b> | <b>3a</b> |
| 2:217909861:C:G        | rs12622764        | 2        | 217909861        | 0.25        | 1.30E-05        | 0.61        | rs6435957        | <i>RP11-574O16.1</i>        | intergenic        | 3.10         | 7         |
| 2:217910311:A:C        | rs66466850        | 2        | 217910311        | 0.25        | 1.36E-05        | 0.61        | rs6435957        | <i>RP11-574O16.1</i>        | intergenic        | 5.47         | 7         |
| 2:217910588:C:T        | rs17778091        | 2        | 217910588        | 0.25        | 1.49E-05        | 0.61        | rs6435957        | <i>RP11-574O16.1</i>        | intergenic        | 7.04         | 5         |
| 2:217912419:C:T        | rs56372055        | 2        | 217912419        | 0.25        | 1.12E-05        | 0.61        | rs6435957        | <i>RP11-574O16.1</i>        | intergenic        | 0.34         | 4         |
| 2:217917222:A:C        | rs59562447        | 2        | 217917222        | 0.25        | 1.15E-05        | 0.60        | rs6435957        | <i>RP11-574O16.1</i>        | intergenic        | 3.07         | 5         |
| <b>2:217919811:A:G</b> | <b>rs17778329</b> | <b>2</b> | <b>217919811</b> | <b>0.25</b> | <b>1.35E-05</b> | <b>0.60</b> | <b>rs6435957</b> | <b><i>RP11-574O16.1</i></b> | <b>intergenic</b> | <b>13.32</b> | <b>2b</b> |
| 2:217923013:A:T        | rs17778427        | 2        | 217923013        | 0.25        | 1.67E-05        | 0.60        | rs6435957        | <i>RP11-574O16.1</i>        | intergenic        | 4.89         | 6         |
| 2:217923605:G:T        | rs17835044        | 2        | 217923605        | 0.25        | 1.55E-05        | 0.60        | rs6435957        | <i>RP11-574O16.1</i>        | intergenic        | 0.29         | 5         |
| 2:217857450:C:T        | rs2252488         | 2        | 217857450        | 0.31        | 1.57E-08        | 0.87        | rs7595393        | <i>AC007563.5</i>           | ncRNA_intronic    | 3.15         | 5         |
| 2:217860468:C:G        | rs4396687         | 2        | 217860468        | 0.31        | 1.30E-08        | 0.87        | rs7595393        | <i>RP11-574O16.1</i>        | upstream          | 0.36         | 7         |
| 2:217861522:C:T        | rs2888449         | 2        | 217861522        | 0.31        | 8.32E-08        | 0.86        | rs7595393        | <i>RP11-574O16.1</i>        | downstream        | 3.46         | 5         |

|                        |                  |          |                  |             |                 |             |                  |                             |                   |             |           |
|------------------------|------------------|----------|------------------|-------------|-----------------|-------------|------------------|-----------------------------|-------------------|-------------|-----------|
| 2:217861809:C:T        | rs4571035        | 2        | 217861809        | 0.34        | 1.96E-09        | 0.98        | rs7595393        | <i>RP11-574O16.1</i>        | downstream        | 3.43        | 7         |
| 2:217862122:A:T        | rs2372931        | 2        | 217862122        | 0.42        | 1.10E-07        | 0.72        | rs7595393        | <i>RP11-574O16.1</i>        | downstream        | 4.09        | 6         |
| 2:217862696:G:T        | rs10195963       | 2        | 217862696        | 0.34        | 1.08E-09        | 0.98        | rs7595393        | <i>RP11-574O16.1</i>        | intergenic        | 3.50        | 5         |
| 2:217863335:A:AT       | rs67177828       | 2        | 217863335        | 0.34        | 1.43E-09        | 0.99        | rs7595393        | <i>RP11-574O16.1</i>        | intergenic        | 3.09        | NA        |
| 2:217866841:A:T        | rs2888450        | 2        | 217866841        | 0.33        | 1.24E-09        | 0.94        | rs7595393        | <i>RP11-574O16.1</i>        | intergenic        | 2.78        | 5         |
| 2:217867417:A:G        | rs4254482        | 2        | 217867417        | 0.33        | 5.86E-10        | 0.94        | rs7595393        | <i>RP11-574O16.1</i>        | intergenic        | 1.26        | 6         |
| 2:217867433:A:G        | rs2372932        | 2        | 217867433        | 0.28        | 3.60E-09        | 0.75        | rs7595393        | <i>RP11-574O16.1</i>        | intergenic        | 1.37        | 6         |
| 2:217867564:A:G        | rs6435956        | 2        | 217867564        | 0.33        | 6.71E-10        | 0.94        | rs7595393        | <i>RP11-574O16.1</i>        | intergenic        | 3.06        | 6         |
| 2:217867889:G:T        | rs4255939        | 2        | 217867889        | 0.33        | 7.47E-10        | 0.94        | rs7595393        | <i>RP11-574O16.1</i>        | intergenic        | 2.76        | 7         |
| 2:217870654:C:T        | rs10192415       | 2        | 217870654        | 0.34        | 4.44E-10        | 0.98        | rs7595393        | <i>RP11-574O16.1</i>        | intergenic        | 2.95        | 6         |
| <b>2:217871254:C:G</b> | <b>rs7595393</b> | <b>2</b> | <b>217871254</b> | <b>0.34</b> | <b>1.71E-10</b> | <b>1.00</b> | <b>rs7595393</b> | <b><i>RP11-574O16.1</i></b> | <b>intergenic</b> | <b>0.45</b> | <b>7</b>  |
| 2:217873530:C:T        | rs2372934        | 2        | 217873530        | 0.37        | 5.87E-09        | 0.88        | rs7595393        | <i>RP11-574O16.1</i>        | intergenic        | 3.14        | 4         |
| <b>2:217873589:C:G</b> | <b>rs2372935</b> | <b>2</b> | <b>217873589</b> | <b>0.34</b> | <b>3.63E-10</b> | <b>1.00</b> | <b>rs7595393</b> | <b><i>RP11-574O16.1</i></b> | <b>intergenic</b> | <b>1.56</b> | <b>3a</b> |
| 2:217874896:A:C        | rs6733648        | 2        | 217874896        | 0.32        | 1.50E-09        | 0.93        | rs7595393        | <i>RP11-574O16.1</i>        | intergenic        | 0.87        | 5         |
| 2:217877730:A:G        | rs35120201       | 2        | 217877730        | 0.35        | 9.13E-09        | 0.81        | rs7595393        | <i>RP11-574O16.1</i>        | intergenic        | 2.45        | 7         |
| 2:217879863:G:T        | rs10932692       | 2        | 217879863        | 0.38        | 5.77E-08        | 0.70        | rs7595393        | <i>RP11-574O16.1</i>        | intergenic        | NA          | 6         |
| 2:217880831:G:T        | rs6723019        | 2        | 217880831        | 0.32        | 3.44E-09        | 0.89        | rs7595393        | <i>RP11-574O16.1</i>        | intergenic        | 5.63        | 5         |
| 2:217885659:C:T        | rs10177578       | 2        | 217885659        | 0.34        | 4.35E-10        | 0.96        | rs7595393        | <i>RP11-574O16.1</i>        | intergenic        | 1.70        | 7         |
| 2:217886970:A:G        | rs4435428        | 2        | 217886970        | 0.32        | 2.60E-09        | 0.89        | rs7595393        | <i>RP11-574O16.1</i>        | intergenic        | 1.36        | 7         |

4

|                        |                   |          |                  |             |                 |             |                  |                             |                   |              |           |
|------------------------|-------------------|----------|------------------|-------------|-----------------|-------------|------------------|-----------------------------|-------------------|--------------|-----------|
| 2:217886991:T:TG       | rs34787363        | 2        | 217886991        | 0.32        | 3.62E-09        | 0.89        | rs7595393        | <i>RP11-574O16.1</i>        | intergenic        | 0.76         | NA        |
| 2:217887021:A:G        | rs4276003         | 2        | 217887021        | 0.32        | 3.20E-09        | 0.89        | rs7595393        | <i>RP11-574O16.1</i>        | intergenic        | 0.46         | 7         |
| <b>2:217888515:C:G</b> | <b>rs2372936</b>  | <b>2</b> | <b>217888515</b> | <b>0.33</b> | <b>2.62E-10</b> | <b>0.94</b> | <b>rs7595393</b> | <b><i>RP11-574O16.1</i></b> | <b>intergenic</b> | <b>12.65</b> | <b>5</b>  |
| 2:217889460:C:T        | rs7425648         | 2        | 217889460        | 0.32        | 2.19E-09        | 0.89        | rs7595393        | <i>RP11-574O16.1</i>        | intergenic        | 0.19         | 7         |
| 2:217890643:A:G        | rs6716542         | 2        | 217890643        | 0.32        | 2.96E-10        | 0.88        | rs7595393        | <i>RP11-574O16.1</i>        | intergenic        | 4.44         | 7         |
| 2:217891692:A:G        | rs17777330        | 2        | 217891692        | 0.32        | 4.04E-10        | 0.88        | rs7595393        | <i>RP11-574O16.1</i>        | intergenic        | 8.90         | 6         |
| <b>2:217892397:A:G</b> | <b>rs10211546</b> | <b>2</b> | <b>217892397</b> | <b>0.32</b> | <b>1.93E-10</b> | <b>0.88</b> | <b>rs7595393</b> | <b><i>RP11-574O16.1</i></b> | <b>intergenic</b> | <b>2.54</b>  | <b>3a</b> |
| 2:217894403:C:G        | rs12465515        | 2        | 217894403        | 0.33        | 2.81E-10        | 0.92        | rs7595393        | <i>RP11-574O16.1</i>        | intergenic        | 9.69         | 6         |
| 2:217894535:C:G        | rs34909633        | 2        | 217894535        | 0.33        | 2.46E-10        | 0.92        | rs7595393        | <i>RP11-574O16.1</i>        | intergenic        | 1.11         | 6         |
| 2:217897541:C:T        | rs13399995        | 2        | 217897541        | 0.33        | 3.13E-10        | 0.93        | rs7595393        | <i>RP11-574O16.1</i>        | intergenic        | 4.87         | 5         |
| 2:217898731:C:T        | rs10199394        | 2        | 217898731        | 0.33        | 4.98E-10        | 0.92        | rs7595393        | <i>RP11-574O16.1</i>        | intergenic        | 1.47         | 7         |
| 2:217899024:C:T        | rs2372940         | 2        | 217899024        | 0.33        | 4.31E-10        | 0.94        | rs7595393        | <i>RP11-574O16.1</i>        | intergenic        | 3.28         | 7         |
| 2:217899308:C:G        | rs2372941         | 2        | 217899308        | 0.33        | 5.64E-10        | 0.94        | rs7595393        | <i>RP11-574O16.1</i>        | intergenic        | 1.14         | 7         |
| 2:217899835:C:G        | rs6705818         | 2        | 217899835        | 0.33        | 3.86E-10        | 0.92        | rs7595393        | <i>RP11-574O16.1</i>        | intergenic        | NA           | 6         |
| 2:217900296:C:T        | rs6721811         | 2        | 217900296        | 0.33        | 4.99E-10        | 0.92        | rs7595393        | <i>RP11-574O16.1</i>        | intergenic        | 2.39         | 6         |
| 2:217900397:A:G        | rs6735298         | 2        | 217900397        | 0.33        | 4.12E-10        | 0.92        | rs7595393        | <i>RP11-574O16.1</i>        | intergenic        | 2.12         | 7         |
| 2:217904513:C:G        | rs2888451         | 2        | 217904513        | 0.32        | 1.55E-09        | 0.89        | rs7595393        | <i>RP11-574O16.1</i>        | intergenic        | 2.00         | 5         |
| 2:217908985:C:T        | rs4621152         | 2        | 217908985        | 0.36        | 1.00E-08        | 0.72        | rs7595393        | <i>RP11-574O16.1</i>        | intergenic        | 5.36         | 4         |
| <b>2:217910910:G:T</b> | <b>rs6723013</b>  | <b>2</b> | <b>217910910</b> | <b>0.33</b> | <b>4.65E-10</b> | <b>0.93</b> | <b>rs7595393</b> | <b><i>RP11-574O16.1</i></b> | <b>intergenic</b> | <b>1.60</b>  | <b>3a</b> |

|             |                       |                   |          |                 |             |                 |             |                   |                      |                 |             |          |
|-------------|-----------------------|-------------------|----------|-----------------|-------------|-----------------|-------------|-------------------|----------------------|-----------------|-------------|----------|
|             | 2:217911504:A:G       | rs6708579         | 2        | 217911504       | 0.33        | 4.61E-10        | 0.92        | rs7595393         | <i>RP11-574O16.1</i> | intergenic      | 0.37        | 5        |
|             | 2:217914112:A:C       | rs2372945         | 2        | 217914112       | 0.34        | 3.09E-10        | 0.86        | rs7595393         | <i>RP11-574O16.1</i> | intergenic      | 0.26        | 6        |
|             | 2:217917167:A:G       | rs11894340        | 2        | 217917167       | 0.36        | 1.09E-08        | 0.72        | rs7595393         | <i>RP11-574O16.1</i> | intergenic      | NA          | 5        |
|             | 2:217918571:C:T       | rs7600412         | 2        | 217918571       | 0.34        | 7.00E-10        | 0.86        | rs7595393         | <i>RP11-574O16.1</i> | intergenic      | 1.07        | 6        |
|             | 2:217918751:C:T       | rs10183545        | 2        | 217918751       | 0.36        | 1.36E-08        | 0.72        | rs7595393         | <i>RP11-574O16.1</i> | intergenic      | 3.61        | 7        |
|             | 2:217921121:C:G       | rs10932693        | 2        | 217921121       | 0.32        | 3.71E-09        | 0.87        | rs7595393         | <i>RP11-574O16.1</i> | intergenic      | 3.90        | 5        |
|             | 2:217924261:A:G       | rs7562029         | 2        | 217924261       | 0.32        | 2.36E-09        | 0.87        | rs7595393         | <i>RP11-574O16.1</i> | intergenic      | 3.79        | 4        |
| <b>MSRA</b> | 8:10192377:C:G        | rs11774474        | 8        | 10192377        | 0.40        | 7.52E-07        | 0.67        | rs11779480        | <i>MSRA</i>          | intronic        | 2.42        | 4        |
| <b>1</b>    | <b>8:10220195:C:G</b> | <b>rs11779480</b> | <b>8</b> | <b>10220195</b> | <b>0.38</b> | <b>2.22E-07</b> | <b>1.00</b> | <b>rs11779480</b> | <b><i>MSRA</i></b>   | <b>intronic</b> | <b>4.24</b> | <b>5</b> |
|             | 8:10224998:A:T        | rs6601449         | 8        | 10224998        | 0.49        | 9.05E-05        | 0.61        | rs11779480        | <i>MSRA</i>          | intronic        | NA          | 7        |
|             | 8:10239612:C:G        | rs10095190        | 8        | 10239612        | 0.42        | 3.24E-06        | 0.73        | rs11779480        | <i>MSRA</i>          | intronic        | 2.42        | 7        |
|             | 8:10119629:A:C        | rs4570161         | 8        | 10119629        | 0.31        | 9.92E-06        | 0.76        | rs4841315         | <i>MSRA</i>          | intronic        | 0.13        | 5        |
|             | 8:10119709:G:T        | rs4288377         | 8        | 10119709        | 0.31        | 4.12E-06        | 0.72        | rs4841315         | <i>MSRA</i>          | intronic        | 3.35        | 6        |
|             | 8:10120879:C:T        | rs9650648         | 8        | 10120879        | 0.31        | 6.03E-06        | 0.77        | rs4841315         | <i>MSRA</i>          | intronic        | 2.05        | 7        |
|             | 8:10121022:C:T        | rs9650649         | 8        | 10121022        | 0.31        | 6.03E-06        | 0.77        | rs4841315         | <i>MSRA</i>          | intronic        | 1.95        | 7        |
|             | 8:10121668:A:C        | rs35524676        | 8        | 10121668        | 0.31        | 7.12E-06        | 0.77        | rs4841315         | <i>MSRA</i>          | intronic        | 2.45        | 5        |
|             | 8:10123493:C:G        | rs35287467        | 8        | 10123493        | 0.31        | 1.26E-05        | 0.77        | rs4841315         | <i>MSRA</i>          | intronic        | 2.53        | 7        |
|             | 8:10125520:A:G        | rs13258691        | 8        | 10125520        | 0.31        | 1.01E-05        | 0.76        | rs4841315         | <i>MSRA</i>          | intronic        | 4.74        | 4        |
|             | 8:10125566:C:G        | rs34514972        | 8        | 10125566        | 0.31        | 7.94E-06        | 0.76        | rs4841315         | <i>MSRA</i>          | intronic        | NA          | 4        |
|             | 8:10125892:A:ACT      | rs35796879        | 8        | 10125892        | 0.31        | 5.06E-06        | 0.77        | rs4841315         | <i>MSRA</i>          | intronic        | 4.66        | NA       |
|             | 8:10128894:A:C        | rs79727658        | 8        | 10128894        | 0.31        | 5.71E-06        | 0.77        | rs4841315         | <i>MSRA</i>          | intronic        | 1.75        | 6        |
|             | 8:10131241:A:T        | rs17151550        | 8        | 10131241        | 0.36        | 0.000553        | 0.64        | rs4841315         | <i>MSRA</i>          | intronic        | 6.14        | 7        |
|             | 8:10133574:A:G        | rs17695316        | 8        | 10133574        | 0.31        | 2.33E-05        | 0.75        | rs4841315         | <i>MSRA</i>          | intronic        | NA          | 5        |
|             | 8:10135193:C:T        | rs2004679         | 8        | 10135193        | 0.32        | 1.13E-05        | 0.81        | rs4841315         | <i>MSRA</i>          | intronic        | 1.89        | NA       |
|             | 8:10135403:A:G        | rs71516564        | 8        | 10135403        | 0.31        | 9.97E-06        | 0.79        | rs4841315         | <i>MSRA</i>          | intronic        | 0.56        | 6        |
|             | 8:10135571:C:G        | rs2004677         | 8        | 10135571        | 0.32        | 9.01E-06        | 0.81        | rs4841315         | <i>MSRA</i>          | intronic        | 0.12        | 7        |
|             | 8:10136710:C:G        | rs11774051        | 8        | 10136710        | 0.32        | 8.31E-06        | 0.81        | rs4841315         | <i>MSRA</i>          | intronic        | 0.61        | 6        |
|             | 8:10137930:G:T        | rs55965226        | 8        | 10137930        | 0.31        | 8.06E-06        | 0.79        | rs4841315         | <i>MSRA</i>          | intronic        | 1.41        | 7        |
|             | 8:10138534:G:T        | rs13272537        | 8        | 10138534        | 0.31        | 6.99E-06        | 0.79        | rs4841315         | <i>MSRA</i>          | intronic        | 4.23        | 7        |

|                 |                       |                   |          |                 |             |                 |             |                    |                |                 |              |           |
|-----------------|-----------------------|-------------------|----------|-----------------|-------------|-----------------|-------------|--------------------|----------------|-----------------|--------------|-----------|
| 2               | 8:10138555:C:G        | rs13264133        | 8        | 10138555        | 0.31        | 6.61E-06        | 0.79        | rs4841315          | MSRA           | intronic        | 2.45         | 6         |
|                 | <b>8:10139470:C:G</b> | <b>rs11783281</b> | <b>8</b> | <b>10139470</b> | <b>0.31</b> | <b>6.24E-06</b> | <b>0.79</b> | <b>rs4841315</b>   | <b>MSRA</b>    | <b>intronic</b> | <b>19.05</b> | <b>7</b>  |
|                 | 8:10140790:G:T        | rs34917779        | 8        | 10140790        | 0.31        | 6.23E-06        | 0.78        | rs4841315          | MSRA           | intronic        | 3.60         | 6         |
|                 | 8:10140875:A:G        | rs10102621        | 8        | 10140875        | 0.36        | 0.000301        | 0.68        | rs4841315          | MSRA           | intronic        | 1.85         | 5         |
|                 | 8:10141227:C:T        | rs10103875        | 8        | 10141227        | 0.36        | 0.000276        | 0.68        | rs4841315          | MSRA           | intronic        | 5.72         | 6         |
|                 | 8:10142227:C:T        | rs4841308         | 8        | 10142227        | 0.31        | 4.39E-06        | 0.81        | rs4841315          | MSRA           | intronic        | 2.45         | 6         |
|                 | 8:10153460:C:T        | rs77205736        | 8        | 10153460        | 0.29        | 2.74E-05        | 0.95        | rs4841315          | MSRA           | intronic        | 4.43         | 6         |
|                 | <b>8:10157202:A:G</b> | <b>rs7817142</b>  | <b>8</b> | <b>10157202</b> | <b>0.29</b> | <b>1.69E-05</b> | <b>0.93</b> | <b>rs4841315</b>   | <b>MSRA</b>    | <b>intronic</b> | <b>12.07</b> | <b>6</b>  |
|                 | 8:10159818:C:T        | rs13269741        | 8        | 10159818        | 0.29        | 1.77E-05        | 0.96        | rs4841315          | MSRA           | intronic        | 0.05         | 5         |
|                 | 8:10162381:A:C        | rs13257313        | 8        | 10162381        | 0.29        | 1.65E-05        | 0.96        | rs4841315          | MSRA           | intronic        | 0.66         | 7         |
|                 | 8:10168583:C:T        | rs11782293        | 8        | 10168583        | 0.32        | 2.52E-06        | 0.84        | rs4841315          | MSRA           | intronic        | 6.61         | 5         |
|                 | 8:10171312:A:G        | rs11249985        | 8        | 10171312        | 0.32        | 2.71E-06        | 0.84        | rs4841315          | MSRA           | intronic        | 7.20         | 5         |
|                 | 8:10178511:A:T        | rs6601436         | 8        | 10178511        | 0.29        | 2.01E-05        | 0.96        | rs4841315          | MSRA           | intronic        | 5.55         | 6         |
|                 | 8:10178810:A:T        | rs7838059         | 8        | 10178810        | 0.29        | 2.12E-05        | 0.96        | rs4841315          | MSRA           | intronic        | NA           | 5         |
|                 | 8:10179230:A:C        | rs4840478         | 8        | 10179230        | 0.29        | 1.78E-05        | 0.96        | rs4841315          | MSRA           | intronic        | 3.76         | 6         |
|                 | 8:10179667:A:C        | rs6601438         | 8        | 10179667        | 0.29        | 1.46E-05        | 0.96        | rs4841315          | MSRA           | intronic        | 0.55         | 7         |
|                 | <b>8:10179684:A:T</b> | <b>rs4841315</b>  | <b>8</b> | <b>10179684</b> | <b>0.29</b> | <b>7.10E-06</b> | <b>1.00</b> | <b>rs4841315</b>   | <b>MSRA</b>    | <b>intronic</b> | <b>4.02</b>  | <b>6</b>  |
|                 | 8:10182144:C:T        | rs11249990        | 8        | 10182144        | 0.32        | 6.17E-06        | 0.83        | rs4841315          | MSRA           | intronic        | 1.30         | 6         |
|                 | <b>8:10184094:G:T</b> | <b>rs11783091</b> | <b>8</b> | <b>10184094</b> | <b>0.32</b> | <b>1.20E-05</b> | <b>0.83</b> | <b>rs4841315</b>   | <b>MSRA</b>    | <b>intronic</b> | <b>16.99</b> | <b>5</b>  |
|                 | <b>8:10192466:C:T</b> | <b>rs11781529</b> | <b>8</b> | <b>10192466</b> | <b>0.30</b> | <b>1.50E-06</b> | <b>0.86</b> | <b>rs56028519</b>  | <b>MSRA</b>    | <b>intronic</b> | <b>7.32</b>  | <b>2b</b> |
| 8:10192519:C:CT | rs36105340            | 8                 | 10192519 | 0.30            | 2.26E-06    | 0.87            | rs56028519  | MSRA               | intronic       | 6.77            | NA           |           |
| 8:10193583:C:G  | rs55656427            | 8                 | 10193583 | 0.28            | 1.98E-07    | 0.97            | rs56028519  | MSRA               | intronic       | 0.13            | 5            |           |
| 8:10194915:T:TC | rs145292201           | 8                 | 10194915 | 0.28            | 2.85E-07    | 0.97            | rs56028519  | MSRA:RP11-212F11.1 | ncRNA_intronic | 1.18            | NA           |           |
| 8:10194917:C:G  | rs144415113           | 8                 | 10194917 | 0.28            | 2.93E-07    | 0.97            | rs56028519  | MSRA:RP11-212F11.1 | ncRNA_intronic | 1.72            | 7            |           |
| 8:10196418:A:C  | rs56141232            | 8                 | 10196418 | 0.28            | 2.05E-07    | 0.96            | rs56028519  | MSRA               | intronic       | NA              | 7            |           |
| 8:10197639:C:T  | rs74699996            | 8                 | 10197639 | 0.28            | 2.01E-07    | 0.98            | rs56028519  | MSRA               | intronic       | 7.45            | 5            |           |
| 8:10197800:C:G  | rs10091197            | 8                 | 10197800 | 0.35            | 0.000308    | 0.71            | rs56028519  | MSRA               | intronic       | 3.15            | 7            |           |
| 8:10197968:C:T  | rs147818026           | 8                 | 10197968 | 0.28            | 1.39E-07    | 0.98            | rs56028519  | MSRA               | intronic       | 1.14            | 7            |           |
| 8:10198468:G:T  | rs6601441             | 8                 | 10198468 | 0.35            | 0.000352    | 0.71            | rs56028519  | MSRA               | intronic       | 0.95            | 5            |           |
| 8:10198474:A:G  | rs78821248            | 8                 | 10198474 | 0.28            | 1.33E-07    | 0.98            | rs56028519  | MSRA               | intronic       | 2.30            | 5            |           |
| 3               | <b>8:10198773:A:G</b> | <b>rs56028519</b> | <b>8</b> | <b>10198773</b> | <b>0.28</b> | <b>7.97E-08</b> | <b>1.00</b> | <b>rs56028519</b>  | <b>MSRA</b>    | <b>intronic</b> | <b>0.02</b>  | <b>7</b>  |
|                 | 8:10200082:A:G        | rs11777018        | 8        | 10200082        | 0.30        | 8.20E-07        | 0.88        | rs56028519         | MSRA           | intronic        | 1.64         | 5         |
|                 | <b>8:10200886:A:G</b> | <b>rs11249991</b> | <b>8</b> | <b>10200886</b> | <b>0.29</b> | <b>2.32E-07</b> | <b>0.95</b> | <b>rs56028519</b>  | <b>MSRA</b>    | <b>intronic</b> | <b>9.01</b>  | <b>2b</b> |
|                 | 8:10201114:G:T        | rs10903325        | 8        | 10201114        | 0.28        | 2.23E-07        | 0.96        | rs56028519         | MSRA           | intronic        | 6.31         | 4         |



|               |                        |                   |           |                 |             |                 |             |                   |                                   |                 |             |           |
|---------------|------------------------|-------------------|-----------|-----------------|-------------|-----------------|-------------|-------------------|-----------------------------------|-----------------|-------------|-----------|
|               | 8:10201364:G:T         | rs11778030        | 8         | 10201364        | 0.31        | 9.85E-07        | 0.86        | rs56028519        | <i>MSRA</i>                       | intronic        | 0.58        | 5         |
|               | 8:10202015:C:T         | rs11785954        | 8         | 10202015        | 0.30        | 9.81E-07        | 0.87        | rs56028519        | <i>MSRA</i>                       | intronic        | 0.57        | 7         |
|               | 8:10203555:G:GT        | rs35886914        | 8         | 10203555        | 0.31        | 9.56E-07        | 0.86        | rs56028519        | <i>MSRA</i>                       | intronic        | 6.50        | NA        |
|               | 8:10204387:C:T         | rs4841325         | 8         | 10204387        | 0.31        | 1.33E-06        | 0.86        | rs56028519        | <i>MSRA</i>                       | intronic        | 3.05        | 7         |
|               | 8:10204562:C:T         | rs4841326         | 8         | 10204562        | 0.30        | 1.11E-06        | 0.87        | rs56028519        | <i>MSRA</i>                       | intronic        | 2.65        | 7         |
|               | 8:10204628:A:G         | rs4840479         | 8         | 10204628        | 0.30        | 1.13E-06        | 0.87        | rs56028519        | <i>MSRA</i>                       | intronic        | 3.11        | 7         |
|               | 8:10206154:A:G         | rs71516569        | 8         | 10206154        | 0.30        | 2.22E-06        | 0.87        | rs56028519        | <i>MSRA</i>                       | intronic        | 6.25        | 6         |
|               | 8:10207289:A:G         | rs6989061         | 8         | 10207289        | 0.27        | 2.15E-06        | 0.90        | rs56028519        | <i>MSRA</i>                       | intronic        | 0.26        | 5         |
|               | 8:10274888:C:T         | rs17767108        | 8         | 10274888        | 0.30        | 1.37E-05        | 0.63        | rs56028519        | <i>MSRA</i>                       | intronic        | 6.14        | 4         |
| <b>FBXO46</b> | 19:46234155:A:G        | rs17878252        | 19        | 46234155        | 0.29        | 0.001999        | 0.67        | rs11883351        | <i>FBXO46</i>                     | UTR5            | 9.72        | NA        |
|               | 19:46244060:A:G        | rs4802273         | 19        | 46244060        | 0.30        | 0.002009        | 0.74        | rs11883351        | <i>AC074212.3</i>                 | intronic        | 8.52        | 6         |
|               | 19:46251768:A:G        | rs4802274         | 19        | 46251768        | 0.32        | 0.001054        | 0.79        | rs11883351        | <i>AC074212.3</i>                 | intronic        | 0.41        | 7         |
|               | 19:46267453:G:T        | rs16980013        | 19        | 46267453        | 0.32        | 0.000907        | 0.80        | rs11883351        | <i>AC074212.3</i>                 | UTR3            | 3.01        | 4         |
|               | 19:46286714:A:C        | rs2070736         | 19        | 46286714        | 0.32        | 0.001095        | 0.80        | rs11883351        | <i>AC011530.4:D</i><br><i>MWD</i> | UTR3            | 2.59        | NA        |
|               | 19:46291672:A:C        | rs55681266        | 19        | 46291672        | 0.32        | 0.001191        | 0.80        | rs11883351        | <i>DMWD</i>                       | intronic        | 9.24        | 5         |
|               | 19:46292023:C:CA       | rs34190352        | 19        | 46292023        | 0.32        | 0.000873        | 0.80        | rs11883351        | <i>DMWD</i>                       | intronic        | 1.13        | NA        |
|               | <b>19:46304400:A:G</b> | <b>rs11883351</b> | <b>19</b> | <b>46304400</b> | <b>0.36</b> | <b>8.75E-06</b> | <b>1.00</b> | <b>rs11883351</b> | <b><i>RSPH6A</i></b>              | <b>intronic</b> | <b>6.94</b> | <b>5</b>  |
|               | 19:46304585:G:T        | rs12463359        | 19        | 46304585        | 0.41        | 0.000198        | 0.82        | rs11883351        | <i>RSPH6A</i>                     | intronic        | 6.75        | 5         |
|               | 19:46306904:C:T        | rs7257103         | 19        | 46306904        | 0.36        | 1.65E-05        | 1.00        | rs11883351        | <i>RSPH6A</i>                     | intronic        | 0.45        | 7         |
|               | 19:46310895:A:C        | rs56096557        | 19        | 46310895        | 0.36        | 1.36E-05        | 0.99        | rs11883351        | <i>RSPH6A</i>                     | intronic        | 2.05        | 7         |
|               | 19:46311420:C:T        | rs56309034        | 19        | 46311420        | 0.36        | 3.57E-05        | 0.99        | rs11883351        | <i>RSPH6A</i>                     | intronic        | 2.39        | 7         |
|               | 19:46312077:A:G        | rs12460541        | 19        | 46312077        | 0.36        | 3.23E-05        | 0.99        | rs11883351        | <i>RSPH6A</i>                     | intronic        | 1.05        | 7         |
|               | 19:46312345:C:T        | rs9797817         | 19        | 46312345        | 0.36        | 1.84E-05        | 0.99        | rs11883351        | <i>RSPH6A</i>                     | intronic        | 0.69        | 6         |
|               | <b>19:46313758:C:G</b> | <b>rs10402263</b> | <b>19</b> | <b>46313758</b> | <b>0.36</b> | <b>9.20E-06</b> | <b>0.99</b> | <b>rs11883351</b> | <b><i>RSPH6A</i></b>              | <b>intronic</b> | <b>0.11</b> | <b>2a</b> |
|               | 19:46315809:A:G        | rs10421891        | 19        | 46315809        | 0.37        | 1.56E-05        | 0.96        | rs11883351        | <i>RSPH6A</i>                     | intronic        | 2.61        | 4         |
| <b>1</b>      | 19:46317193:C:T        | rs4286201         | 19        | 46317193        | 0.33        | 0.000626        | 0.82        | rs11883351        | <i>RSPH6A</i>                     | intronic        | 0.03        | 5         |
|               | <b>19:46317593:G:T</b> | <b>rs4514788</b>  | <b>19</b> | <b>46317593</b> | <b>0.33</b> | <b>0.000629</b> | <b>0.82</b> | <b>rs11883351</b> | <b><i>RSPH6A</i></b>              | <b>intronic</b> | <b>3.01</b> | <b>3a</b> |
|               | <b>19:46320780:C:T</b> | <b>rs10401439</b> | <b>19</b> | <b>46320780</b> | <b>0.33</b> | <b>0.000621</b> | <b>0.82</b> | <b>rs11883351</b> | <b><i>SYMPK</i></b>               | <b>intronic</b> | <b>6.20</b> | <b>1f</b> |
|               | 19:46322391:A:G        | rs56243424        | 19        | 46322391        | 0.33        | 0.000489        | 0.82        | rs11883351        | <i>SYMPK</i>                      | intronic        | 1.76        | 5         |
|               | 19:46322585:C:T        | rs4803857         | 19        | 46322585        | 0.33        | 0.000458        | 0.82        | rs11883351        | <i>SYMPK</i>                      | intronic        | 3.91        | 5         |
|               | 19:46322830:C:T        | rs4802279         | 19        | 46322830        | 0.41        | 0.000177        | 0.78        | rs11883351        | <i>SYMPK</i>                      | intronic        | 1.53        | 5         |
|               | 19:46325618:C:T        | rs56178951        | 19        | 46325618        | 0.33        | 0.000883        | 0.82        | rs11883351        | <i>SYMPK</i>                      | intronic        | 5.64        | 5         |
|               | 19:46327933:C:T        | rs10500292        | 19        | 46327933        | 0.41        | 0.000221        | 0.78        | rs11883351        | <i>SYMPK</i>                      | intronic        | 5.31        | 5         |
|               | 19:46328179:C:T        | rs4803861         | 19        | 46328179        | 0.33        | 0.000832        | 0.82        | rs11883351        | <i>SYMPK</i>                      | intronic        | 5.63        | 5         |

|                        |                   |           |                 |             |                 |             |                   |                                    |                   |             |          |   |
|------------------------|-------------------|-----------|-----------------|-------------|-----------------|-------------|-------------------|------------------------------------|-------------------|-------------|----------|---|
| 19:46334141:C:T        | rs56276426        | 19        | 46334141        | 0.34        | 0.001014        | 0.77        | rs11883351        | <i>SYMPK:AC09230I.3</i>            | ncRNA_intronic    | 1.91        | 7        |   |
| 19:46335131:A:G        | rs73047896        | 19        | 46335131        | 0.33        | 0.000699        | 0.83        | rs11883351        | <i>SYMPK</i>                       | intronic          | 0.93        | 7        |   |
| 19:46338729:C:T        | rs918490          | 19        | 46338729        | 0.33        | 0.001426        | 0.83        | rs11883351        | <i>SYMPK</i>                       | intronic          | 0.87        | NA       |   |
| 19:46339659:C:T        | rs7246123         | 19        | 46339659        | 0.33        | 0.001884        | 0.82        | rs11883351        | <i>SYMPK</i>                       | intronic          | 1.44        | 6        |   |
| 19:46342220:C:T        | rs6509236         | 19        | 46342220        | 0.33        | 0.001895        | 0.82        | rs11883351        | <i>SYMPK</i>                       | intronic          | 1.90        | 7        |   |
| 19:46346330:C:T        | rs8106955         | 19        | 46346330        | 0.33        | 0.001041        | 0.83        | rs11883351        | <i>SYMPK</i>                       | intronic          | 0.79        | 5        |   |
| 19:46349311:A:G        | rs6509237         | 19        | 46349311        | 0.33        | 0.001293        | 0.82        | rs11883351        | <i>SYMPK</i>                       | intronic          | 0.76        | 7        |   |
| <b>19:46367206:C:T</b> | <b>rs10412574</b> | <b>19</b> | <b>46367206</b> | <b>0.33</b> | <b>0.001249</b> | <b>0.82</b> | <b>rs11883351</b> | <b><i>FOXA3</i></b>                | <b>upstream</b>   | <b>6.70</b> | <b>4</b> |   |
| 19:46224156:A:G        | rs35732815        | 19        | 46224156        | 0.46        | 7.80E-07        | 0.99        | rs4802272         | <i>FBXO46</i>                      | intronic          | 3.26        | 4        |   |
| 19:46225952:A:G        | rs34388571        | 19        | 46225952        | 0.46        | 8.17E-07        | 0.99        | rs4802272         | <i>FBXO46</i>                      | intronic          | 1.40        | 5        |   |
| 19:46227880:C:T        | rs57947504        | 19        | 46227880        | 0.46        | 9.34E-07        | 0.99        | rs4802272         | <i>FBXO46</i>                      | intronic          | 3.25        | 7        |   |
| <b>19:46235950:A:G</b> | <b>rs4802272</b>  | <b>19</b> | <b>46235950</b> | <b>0.46</b> | <b>3.17E-07</b> | <b>1.00</b> | <b>rs4802272</b>  | <b><i>AC074212.3</i></b>           | <b>upstream</b>   | <b>0.34</b> | <b>7</b> |   |
| 19:46238555:C:T        | rs2041975         | 19        | 46238555        | 0.47        | 1.35E-06        | 0.95        | rs4802272         | <i>AC074212.3</i>                  | intronic          | 3.03        | 7        |   |
| 19:46241195:C:T        | rs12610941        | 19        | 46241195        | 0.47        | 1.62E-06        | 0.95        | rs4802272         | <i>AC074212.3</i>                  | intronic          | 1.99        | 6        |   |
| 19:46246704:C:T        | rs10415988        | 19        | 46246704        | 0.46        | 1.99E-06        | 0.92        | rs4802272         | <i>AC074212.3</i>                  | intronic          | 3.89        | 4        |   |
| 19:46247641:A:G        | rs10422883        | 19        | 46247641        | 0.46        | 1.36E-06        | 0.92        | rs4802272         | <i>AC074212.3</i>                  | intronic          | 3.47        | 7        |   |
| 19:46251362:A:G        | rs12611358        | 19        | 46251362        | 0.47        | 1.17E-06        | 0.95        | rs4802272         | <i>AC074212.3</i>                  | intronic          | 1.19        | 7        |   |
| 19:46251460:C:T        | rs10401487        | 19        | 46251460        | 0.47        | 8.70E-07        | 0.95        | rs4802272         | <i>AC074212.3</i>                  | intronic          | 1.58        | 7        |   |
| 19:46255075:A:G        | rs10416076        | 19        | 46255075        | 0.47        | 1.11E-06        | 0.95        | rs4802272         | <i>AC074212.3</i>                  | intronic          | 1.62        | 7        |   |
| 19:46255139:C:T        | rs11083781        | 19        | 46255139        | 0.47        | 1.07E-06        | 0.95        | rs4802272         | <i>AC074212.3</i>                  | intronic          | 1.97        | 7        |   |
| 19:46257358:A:C        | rs10404730        | 19        | 46257358        | 0.47        | 5.11E-07        | 0.95        | rs4802272         | <i>AC074212.3</i>                  | intronic          | 0.56        | 7        |   |
| 19:46258993:G:T        | rs10419334        | 19        | 46258993        | 0.47        | 5.01E-07        | 0.95        | rs4802272         | <i>AC074212.3</i>                  | intronic          | 0.09        | 7        |   |
| 19:46260245:A:G        | rs7260651         | 19        | 46260245        | 0.47        | 1.31E-06        | 0.94        | rs4802272         | <i>AC074212.3</i>                  | intronic          | 0.56        | 5        |   |
| 19:46260375:C:T        | rs4802275         | 19        | 46260375        | 0.47        | 1.33E-06        | 0.94        | rs4802272         | <i>AC074212.3</i>                  | intronic          | 5.94        | 5        |   |
| 19:46260748:C:T        | rs4802276         | 19        | 46260748        | 0.47        | 5.98E-07        | 0.95        | rs4802272         | <i>AC074212.3</i>                  | intronic          | 6.41        | 7        |   |
| 19:46261247:A:G        | rs4802277         | 19        | 46261247        | 0.47        | 1.23E-06        | 0.94        | rs4802272         | <i>AC074212.3</i>                  | intronic          | 0.01        | 4        |   |
| 19:46261762:A:G        | rs2341096         | 19        | 46261762        | 0.47        | 1.17E-06        | 0.94        | rs4802272         | <i>AC074212.3</i>                  | intronic          | 2.66        | 7        |   |
| 19:46261982:C:T        | rs10401971        | 19        | 46261982        | 0.47        | 1.30E-06        | 0.94        | rs4802272         | <i>AC074212.3</i>                  | intronic          | 0.77        | 7        |   |
| <b>2</b>               | 19:46265029:C:T   | rs8112282 | 19              | 46265029    | 0.47            | 1.35E-06    | 0.95              | rs4802272                          | <i>AC074212.3</i> | exonic      | 11.16    | 5 |
| 19:46269076:A:G        | rs2014576         | 19        | 46269076        | 0.45        | 1.35E-06        | 0.84        | rs4802272         | <i>AC074212.5:SI X5</i>            | exonic            | 9.42        | NA       |   |
| 19:46271177:G:T        | rs3745802         | 19        | 46271177        | 0.47        | 1.23E-06        | 0.94        | rs4802272         | <i>AC074212.5:SI X5:AC074212.3</i> | ncRNA_exonic      | 8.56        | 4        |   |

|                        |                   |           |                 |             |                 |             |                  |                                    |                 |              |           |
|------------------------|-------------------|-----------|-----------------|-------------|-----------------|-------------|------------------|------------------------------------|-----------------|--------------|-----------|
| 19:46274171:A:C        | rs635299          | 19        | 46274171        | 0.47        | 5.78E-07        | 0.94        | rs4802272        | <i>AC074212.6:D<br/>MPK</i>        | ncRNA_intronic  | 2.54         | NA        |
| 19:46274972:A:C        | rs915915          | 19        | 46274972        | 0.47        | 7.14E-07        | 0.93        | rs4802272        | <i>AC074212.6:D<br/>MPK</i>        | ncRNA_exonic    | 5.82         | NA        |
| 19:46276056:A:C        | rs16939           | 19        | 46276056        | 0.47        | 1.10E-06        | 0.94        | rs4802272        | <i>DMPK</i>                        | intronic        | 5.47         | 4         |
| 19:46277288:A:C        | rs4803854         | 19        | 46277288        | 0.47        | 1.20E-06        | 0.94        | rs4802272        | <i>DMPK</i>                        | intronic        | 2.34         | 5         |
| <b>19:46284334:G:T</b> | <b>rs672348</b>   | <b>19</b> | <b>46284334</b> | <b>0.47</b> | <b>8.87E-07</b> | <b>0.94</b> | <b>rs4802272</b> | <b><i>DMPK:AC011<br/>530.4</i></b> | <b>intronic</b> | <b>12.43</b> | <b>NA</b> |
| 19:46284520:A:G        | rs522769          | 19        | 46284520        | 0.47        | 8.57E-07        | 0.94        | rs4802272        | <i>DMPK:AC0115<br/>30.4</i>        | intronic        | 10.93        | 5         |
| 19:46287200:C:G        | rs617988          | 19        | 46287200        | 0.47        | 9.29E-07        | 0.94        | rs4802272        | <i>AC011530.4:D<br/>MWD</i>        | UTR3            | 6.87         | 5         |
| 19:46292259:A:G        | rs7246377         | 19        | 46292259        | 0.47        | 3.76E-07        | 0.94        | rs4802272        | <i>DMWD</i>                        | intronic        | NA           | 5         |
| 19:46294510:A:G        | rs1865116         | 19        | 46294510        | 0.47        | 7.79E-07        | 0.94        | rs4802272        | <i>DMWD</i>                        | intronic        | 6.02         | 4         |
| <b>19:46296230:A:T</b> | <b>rs62111759</b> | <b>19</b> | <b>46296230</b> | <b>0.47</b> | <b>3.58E-07</b> | <b>0.94</b> | <b>rs4802272</b> | <b><i>DMWD</i></b>                 | <b>upstream</b> | <b>12.93</b> | <b>4</b>  |
| 19:46301456:A:C        | rs35226705        | 19        | 46301456        | 0.44        | 1.45E-06        | 0.63        | rs4802272        | <i>RSPH6A</i>                      | intronic        | 0.73         | 6         |

Note: Associated genomic loci were defined by SNPs in LD ( $r^2 > 0.6$ ) with the **independent significant SNPs (IndSigSNP)** in the sample-size weighted meta-analysis. \***IND**: independent significant block; †**MAF**: minor allele frequency; ‡**r2**: Linkage disequilibrium; §**CADD**: Combined Annotation Dependent Depletion score; ||**RDB**: Regulome DB score; Table sorted by gwas\_P and POS\_B37. independent significant SNPs were marked as bold red. Functioned SNPs identified by CADD score ( $> 12$ ) and RDB score ( $< 3b$ ) were marked as bold black.

**Supplementary Table II. MAGMA Gene-Set Analysis**

| <b>Go terms</b>                                                                     | <b>NGENES</b> | <b>BETA</b> | <b>BETA_</b><br><b>STD</b> | <b>SE</b> | <b>P</b> |
|-------------------------------------------------------------------------------------|---------------|-------------|----------------------------|-----------|----------|
| GO_bp:go_cardiac_ventricle_formation                                                | 10            | 1.454       | 0.033                      | 0.321     | 3.09E-06 |
| GO_bp:go_his_purkinje_system_development                                            | 5             | 1.935       | 0.031                      | 0.429     | 3.28E-06 |
| GO_bp:go_cardiac_chamber_formation                                                  | 12            | 1.094       | 0.027                      | 0.255     | 8.94E-06 |
| GO_cc:go_transcription_factor_complex                                               | 343           | 0.183       | 0.024                      | 0.047     | 5.04E-05 |
| GO_bp:go_mammary_gland_branching_involved_in_pregnancy                              | 5             | 1.477       | 0.024                      | 0.395     | 9.35E-05 |
| GO_bp:go_cardiac_right_ventricle_morphogenesis                                      | 19            | 0.772       | 0.024                      | 0.209     | 1.11E-04 |
| GO_bp:go_cardioblast_differentiation                                                | 19            | 0.604       | 0.019                      | 0.165     | 1.24E-04 |
| GO_bp:go_apoptotic_process_involved_in_heart_morphogenesis                          | 5             | 1.290       | 0.021                      | 0.362     | 1.81E-04 |
| GO_bp:go_atrial_septum_morphogenesis                                                | 16            | 0.656       | 0.019                      | 0.192     | 3.08E-04 |
| GO_bp:go_cardiac_atrium_development                                                 | 34            | 0.477       | 0.020                      | 0.139     | 3.12E-04 |
| GO_cc:go_ciliary_rootlet                                                            | 10            | 0.966       | 0.022                      | 0.288     | 4.05E-04 |
| GO_bp:go_paracrine_signaling                                                        | 7             | 1.145       | 0.022                      | 0.346     | 4.63E-04 |
| GO_bp:go_response_to_transforming_growth_factor_beta                                | 235           | 0.181       | 0.020                      | 0.055     | 4.91E-04 |
| GO_bp:go_positive_regulation_of_cardiocyte_differentiation                          | 28            | 0.473       | 0.018                      | 0.147     | 6.25E-04 |
| GO_bp:go_negative_regulation_of_phospholipid_biosynthetic_process                   | 4             | 1.471       | 0.021                      | 0.456     | 6.28E-04 |
| GO_bp:go_heart_development                                                          | 530           | 0.121       | 0.020                      | 0.038     | 6.83E-04 |
| GO_bp:go_ventricular_cardiac_muscle_tissue_development                              | 54            | 0.393       | 0.021                      | 0.123     | 6.98E-04 |
| GO_cc:go_nuclear_transcription_factor_complex                                       | 189           | 0.201       | 0.020                      | 0.063     | 7.08E-04 |
| GO_bp:go_cell_proliferation_involved_in_heart_morphogenesis                         | 18            | 0.603       | 0.018                      | 0.191     | 8.16E-04 |
| GO_bp:go_regulation_of_secondary_heart_field_cardioblast_proliferation              | 10            | 0.842       | 0.019                      | 0.269     | 8.64E-04 |
| GO_cc:go_sarcoplasmic_reticulum_lumen                                               | 8             | 0.990       | 0.020                      | 0.318     | 9.37E-04 |
| GO_bp:go_atrial_septum_development                                                  | 20            | 0.555       | 0.018                      | 0.181     | 1.06E-03 |
| GO_bp:go_positive_regulation_of_cardiac_vascular_smooth_muscle_cell_differentiation | 2             | 1.253       | 0.013                      | 0.409     | 1.10E-03 |
| GO_bp:go_positive_regulation_of_cardioblast_differentiation                         | 6             | 0.832       | 0.015                      | 0.275     | 1.27E-03 |
| GO_bp:go_positive_regulation_of_stem_cell_differentiation                           | 20            | 0.518       | 0.017                      | 0.172     | 1.30E-03 |
| GO_bp:go_amino_sugar_catabolic_process                                              | 8             | 0.935       | 0.019                      | 0.312     | 1.37E-03 |
| GO_mf:go_inositol_trisphosphate_phosphatase_activity                                | 6             | 1.239       | 0.022                      | 0.414     | 1.39E-03 |
| GO_bp:go_regulation_of_lung_blood_pressure                                          | 4             | 1.084       | 0.016                      | 0.362     | 1.39E-03 |
| GO_cc:go_unconventional_myosin_complex                                              | 10            | 0.809       | 0.018                      | 0.271     | 1.40E-03 |
| GO_bp:go_stress_granule_disassembly                                                 | 5             | 1.363       | 0.022                      | 0.457     | 1.44E-03 |
| GO_cc:go_radial_spoke                                                               | 6             | 1.339       | 0.024                      | 0.449     | 1.44E-03 |
| GO_bp:go_transmembrane_receptor_protein_serine_threonine_kinase_signaling_pathway   | 318           | 0.141       | 0.018                      | 0.048     | 1.54E-03 |
| GO_bp:go_positive_regulation_of_phospholipase_a2_activity                           | 6             | 1.503       | 0.027                      | 0.509     | 1.59E-03 |
| GO_bp:go_amyloid_beta_clearance                                                     | 30            | 0.444       | 0.018                      | 0.151     | 1.63E-03 |

|                                                                                           |      |       |       |       |          |
|-------------------------------------------------------------------------------------------|------|-------|-------|-------|----------|
| GO_bp:go_regulation_of_platelet_derived_growth_factor_receptor_beta_signaling_pathway     | 8    | 0.804 | 0.016 | 0.274 | 1.65E-03 |
| GO_bp:go_cell_differentiation_involved_in_kidney_development                              | 50   | 0.342 | 0.017 | 0.118 | 1.93E-03 |
| GO_bp:go_activin_receptor_signaling_pathway                                               | 40   | 0.412 | 0.019 | 0.143 | 2.01E-03 |
| GO_bp:go_regulation_of_platelet_derived_growth_factor_receptor_signaling_pathway          | 23   | 0.459 | 0.016 | 0.160 | 2.11E-03 |
| GO_bp:go_mononuclear_cell_differentiation                                                 | 34   | 0.445 | 0.019 | 0.156 | 2.22E-03 |
| GO_mf:go_transcription_factor_binding                                                     | 614  | 0.099 | 0.017 | 0.035 | 2.28E-03 |
| GO_bp:go_ascending_aorta_development                                                      | 5    | 1.116 | 0.018 | 0.398 | 2.51E-03 |
| GO_bp:go_negative_regulation_of_platelet_derived_growth_factor_receptor_signaling_pathway | 13   | 0.532 | 0.014 | 0.190 | 2.53E-03 |
| GO_mf:go_activin_activated_receptor_activity                                              | 7    | 0.946 | 0.018 | 0.338 | 2.55E-03 |
| GO_bp:go_sarcomere_organization                                                           | 47   | 0.345 | 0.017 | 0.124 | 2.62E-03 |
| GO_mf:go_at_dna_binding                                                                   | 10   | 0.976 | 0.022 | 0.350 | 2.64E-03 |
| GO_bp:go_vitamin_d3_metabolic_process                                                     | 5    | 0.975 | 0.016 | 0.350 | 2.65E-03 |
| GO_bp:go_regulation_of_skeletal_muscle_contraction_by_calcium_ion_signaling               | 5    | 1.192 | 0.019 | 0.431 | 2.85E-03 |
| GO_bp:go_pharyngeal_system_development                                                    | 26   | 0.479 | 0.018 | 0.174 | 2.88E-03 |
| GO_bp:go_negative_regulation_of_blood_vessel_endothelial_cell_migration                   | 30   | 0.440 | 0.017 | 0.159 | 2.89E-03 |
| GO_bp:go_cell_differentiation_involved_in_metanephros_development                         | 25   | 0.440 | 0.016 | 0.160 | 3.02E-03 |
| GO_bp:go_regulation_of_cardiac_vascular_smooth_muscle_cell_differentiation                | 3    | 1.037 | 0.013 | 0.379 | 3.14E-03 |
| GO_bp:go_cardiac_ventricle_morphogenesis                                                  | 71   | 0.295 | 0.018 | 0.108 | 3.15E-03 |
| GO_bp:go_positive_regulation_of_muscle_tissue_development                                 | 68   | 0.277 | 0.017 | 0.102 | 3.16E-03 |
| GO_bp:go_positive_regulation_of_phosphatidylinositol_3_kinase_signaling                   | 84   | 0.240 | 0.016 | 0.088 | 3.23E-03 |
| GO_bp:go_fibroblast_apoptotic_process                                                     | 20   | 0.521 | 0.017 | 0.191 | 3.24E-03 |
| GO_bp:go_middle_ear_morphogenesis                                                         | 20   | 0.457 | 0.015 | 0.169 | 3.40E-03 |
| GO_bp:go_regulation_of_cardioblast_differentiation                                        | 8    | 0.650 | 0.013 | 0.240 | 3.42E-03 |
| GO_bp:go_regulation_of_phenotypic_switching                                               | 7    | 0.761 | 0.015 | 0.282 | 3.45E-03 |
| GO_bp:go_phenotypic_switching                                                             | 7    | 0.761 | 0.015 | 0.282 | 3.45E-03 |
| GO_bp:go_positive_regulation_of_biosynthetic_process                                      | 1858 | 0.057 | 0.017 | 0.021 | 3.49E-03 |
| GO_bp:go_pigment_granule_organization                                                     | 24   | 0.508 | 0.018 | 0.188 | 3.50E-03 |
| GO_bp:go_cardiac_muscle_cell_myoblast_differentiation                                     | 11   | 0.606 | 0.015 | 0.225 | 3.58E-03 |
| GO_bp:go_positive_regulation_of_blood_circulation                                         | 64   | 0.292 | 0.017 | 0.109 | 3.62E-03 |
| GO_bp:go_negative_regulation_of_macrophage_cytokine_production                            | 5    | 0.753 | 0.012 | 0.280 | 3.63E-03 |
| GO_bp:go_atrioventricular_valve_development                                               | 24   | 0.467 | 0.017 | 0.175 | 3.80E-03 |
| GO_bp:go_branch_elongation_of_an_epithelium                                               | 21   | 0.586 | 0.019 | 0.220 | 3.86E-03 |
| GO_mf:go_ma_polymerase_ii_transcription_factor_binding                                    | 50   | 0.317 | 0.016 | 0.119 | 3.87E-03 |
| GO_bp:go_zinc_ion_transmembrane_transport                                                 | 22   | 0.580 | 0.020 | 0.219 | 3.99E-03 |
| GO_mf:go_inositol_polyphosphate_5_phosphatase_activity                                    | 5    | 1.212 | 0.020 | 0.458 | 4.07E-03 |
| GO_bp:go_positive_regulation_of_cardiac_muscle_tissue_development                         | 44   | 0.326 | 0.016 | 0.123 | 4.07E-03 |
| GO_bp:go_pharyngeal_arch_artery_morphogenesis                                             | 8    | 0.733 | 0.015 | 0.277 | 4.10E-03 |
| GO_bp:go_muscle_tissue_development                                                        | 373  | 0.119 | 0.016 | 0.045 | 4.10E-03 |

|                                                                                  |      |       |       |       |          |
|----------------------------------------------------------------------------------|------|-------|-------|-------|----------|
| GO_bp:go_platelet_derived_growth_factor_receptor_signaling_pathway               | 55   | 0.277 | 0.015 | 0.105 | 4.11E-03 |
| GO_mf:go_peroxisome_targeting_sequence_binding                                   | 5    | 0.775 | 0.013 | 0.294 | 4.15E-03 |
| GO_bp:go_negative_regulation_of_amyloid_beta_clearance                           | 5    | 0.844 | 0.014 | 0.320 | 4.16E-03 |
| GO_bp:go_cardioblast_proliferation                                               | 11   | 0.656 | 0.016 | 0.249 | 4.17E-03 |
| GO_bp:go_ductus_arteriosus_closure                                               | 5    | 0.853 | 0.014 | 0.324 | 4.25E-03 |
| GO_cc:go_u7_snmp                                                                 | 7    | 0.976 | 0.019 | 0.373 | 4.48E-03 |
| GO_cc:go_ma_polymerase_ii_transcription_factor_complex                           | 152  | 0.182 | 0.016 | 0.070 | 4.57E-03 |
| GO_cc:go_extrinsic_component_of_mitochondrial_inner_membrane                     | 13   | 0.663 | 0.017 | 0.255 | 4.70E-03 |
| GO_bp:go_regulation_of_phosphatidylinositol_3_kinase_signaling                   | 117  | 0.199 | 0.015 | 0.077 | 4.81E-03 |
| GO_cc:go_i_band                                                                  | 129  | 0.190 | 0.016 | 0.074 | 4.86E-03 |
| GO_bp:go_negative_regulation_of_response_to_wounding                             | 84   | 0.238 | 0.016 | 0.093 | 5.04E-03 |
| GO_bp:go_epithelial_cell_differentiation_involved_in_kidney_development          | 41   | 0.334 | 0.015 | 0.130 | 5.07E-03 |
| GO_bp:go_cardiac_muscle_tissue_development                                       | 203  | 0.151 | 0.015 | 0.059 | 5.10E-03 |
| GO_bp:go_regulation_of_dna_binding                                               | 120  | 0.199 | 0.016 | 0.078 | 5.17E-03 |
| GO_bp:go_regulation_of_cell_chemotaxis_to_fibroblast_growth_factor               | 6    | 0.900 | 0.016 | 0.352 | 5.24E-03 |
| GO_bp:go_positive_regulation_of_ma_biosynthetic_process                          | 1518 | 0.058 | 0.016 | 0.023 | 5.66E-03 |
| GO_bp:go_regulation_of_the_force_of_heart_contraction                            | 27   | 0.457 | 0.017 | 0.181 | 5.68E-03 |
| GO_bp:go_negative_regulation_of_vascular_associated_smooth_muscle_cell_migration | 6    | 0.716 | 0.013 | 0.287 | 6.30E-03 |
| GO_cc:go_platelet_alpha_granule                                                  | 81   | 0.249 | 0.016 | 0.100 | 6.54E-03 |
| GO_mf:go_transcription_coregulator_activity                                      | 528  | 0.092 | 0.015 | 0.037 | 6.63E-03 |
| GO_mf:go_smad_binding                                                            | 76   | 0.231 | 0.015 | 0.093 | 6.66E-03 |
| GO_cc:go_u4_snmp                                                                 | 10   | 0.690 | 0.016 | 0.279 | 6.69E-03 |
| GO_mf:go_nitric_oxide_synthase_regulator_activity                                | 9    | 0.626 | 0.014 | 0.253 | 6.71E-03 |
| GO_bp:go_regulation_of_cardiocyte_differentiation                                | 47   | 0.284 | 0.014 | 0.115 | 6.75E-03 |
| GO_bp:go_branch_elongation_involved_in_ureteric_bud_branching                    | 5    | 1.082 | 0.017 | 0.439 | 6.92E-03 |
| GO_cc:go_clathrin_coated_endocytic_vesicle                                       | 59   | 0.276 | 0.015 | 0.113 | 7.15E-03 |
| GO_bp:go_post_embryonic_animal_organ_development                                 | 15   | 0.578 | 0.016 | 0.236 | 7.21E-03 |
| GO_bp:go_regulation_of_cell_communication_by_electrical_coupling                 | 12   | 0.584 | 0.015 | 0.239 | 7.31E-03 |
| GO_bp:go_cardiocyte_differentiation                                              | 140  | 0.166 | 0.014 | 0.068 | 7.35E-03 |
| GO_bp:go_positive_regulation_of_extracellular_matrix_assembly                    | 5    | 0.956 | 0.015 | 0.392 | 7.37E-03 |
| GO_bp:go_dna_templated_transcription_initiation                                  | 233  | 0.140 | 0.015 | 0.057 | 7.37E-03 |
| GO_bp:go_glycerol_ether_biosynthetic_process                                     | 6    | 0.760 | 0.013 | 0.312 | 7.42E-03 |
| GO_bp:go_transforming_growth_factor_beta_receptor_signaling_pathway              | 179  | 0.152 | 0.015 | 0.062 | 7.51E-03 |
| GO_bp:go_negative_regulation_of_dna_binding                                      | 50   | 0.298 | 0.015 | 0.123 | 7.62E-03 |
| GO_cc:go_extrinsic_component_of_external_side_of_plasma_membrane                 | 8    | 0.588 | 0.012 | 0.243 | 7.77E-03 |
| GO_bp:go_regulation_of_peptidyl_cysteine_s_nitrosylation                         | 7    | 0.872 | 0.017 | 0.361 | 7.79E-03 |
| GO_bp:go_circulatory_system_development                                          | 1004 | 0.067 | 0.015 | 0.028 | 7.86E-03 |
| GO_mf:go_succinate_transmembrane_transporter_activity                            | 7    | 0.842 | 0.016 | 0.349 | 7.87E-03 |

|                                                                                                        |     |       |       |       |          |
|--------------------------------------------------------------------------------------------------------|-----|-------|-------|-------|----------|
| GO_bp:go_succinate_transport                                                                           | 7   | 0.842 | 0.016 | 0.349 | 7.87E-03 |
| GO_bp:go_regulation_of_glutamine_family_amino_acid_metabolic_process                                   | 6   | 0.787 | 0.014 | 0.326 | 7.95E-03 |
| GO_bp:go_positive_regulation_of_inflammatory_response_to_antigenic_stimulus                            | 10  | 0.648 | 0.015 | 0.269 | 8.08E-03 |
| GO_bp:go_regulation_of_myoblast_differentiation                                                        | 52  | 0.280 | 0.015 | 0.116 | 8.11E-03 |
| GO_bp:go_regulation_of_phospholipase_a2_activity                                                       | 13  | 0.743 | 0.019 | 0.310 | 8.28E-03 |
| GO_bp:go_negative_regulation_of_response_to_interferon_gamma                                           | 7   | 0.833 | 0.016 | 0.348 | 8.31E-03 |
| GO_cc:go_clathrin_vesicle_coat                                                                         | 28  | 0.365 | 0.014 | 0.153 | 8.58E-03 |
| GO_bp:go_positive_regulation_of_heart_contraction                                                      | 34  | 0.330 | 0.014 | 0.139 | 8.74E-03 |
| GO_bp:go_response_to_macrophage_colony_stimulating_factor                                              | 12  | 0.666 | 0.017 | 0.281 | 8.90E-03 |
| GO_bp:go_regulation_of_vascular_smooth_muscle_cell_dedifferentiation                                   | 2   | 1.433 | 0.015 | 0.605 | 8.90E-03 |
| GO_bp:go_positive_regulation_of_developmental_pigmentation                                             | 9   | 0.705 | 0.015 | 0.297 | 8.92E-03 |
| GO_cc:go_bloc_1_complex                                                                                | 16  | 0.490 | 0.014 | 0.208 | 9.15E-03 |
| GO_mf:go_phosphorus_oxygen_lyase_activity                                                              | 21  | 0.427 | 0.014 | 0.181 | 9.26E-03 |
| GO_bp:go_regulation_of_muscle_organ_development                                                        | 132 | 0.175 | 0.014 | 0.074 | 9.34E-03 |
| GO_bp:go_positive_regulation_of_astrocyte_differentiation                                              | 16  | 0.517 | 0.015 | 0.220 | 9.34E-03 |
| GO_bp:go_negative_regulation_of_interleukin_6_secretion                                                | 9   | 0.599 | 0.013 | 0.255 | 9.48E-03 |
| GO_bp:go_cardiac_muscle_tissue_morphogenesis                                                           | 68  | 0.249 | 0.015 | 0.106 | 9.57E-03 |
| GO_bp:go_regulation_of_skeletal_muscle_contraction_by_regulation_of_release_of_sequestered_calcium_ion | 4   | 1.024 | 0.015 | 0.437 | 9.60E-03 |
| GO_bp:go_heart_morphogenesis                                                                           | 246 | 0.128 | 0.014 | 0.055 | 9.69E-03 |
| GO_bp:go_primary_alcohol_metabolic_process                                                             | 62  | 0.261 | 0.015 | 0.112 | 9.72E-03 |
| GO_bp:go_blood_vessel_remodeling                                                                       | 37  | 0.358 | 0.016 | 0.154 | 9.87E-03 |
| GO_bp:go_endodermal_cell_fate_specification                                                            | 8   | 0.939 | 0.019 | 0.403 | 9.91E-03 |
| GO_bp:go_venous_blood_vessel_development                                                               | 15  | 0.514 | 0.014 | 0.221 | 9.91E-03 |

Note: MAGMA gene-set analysis is performed for GO terms obtained from MsigDB. The table displays significant gene sets with P-value < 0.01. MAGMA gene-set analyses uses the full distribution of SNP p-values.
